# Supplementary material for: GWAS of allometric body-shape indices in UK Biobank identifies loci suggesting associations with morphogenesis, organogenesis, adrenal cell renewal and cancer
Source: PubMed Central journal article supplement (PMC8139988; doi:10.1038/s41598-021-89176-6), 2021-05-21
Supplement: 41598_2021_89176_MOESM1_ESM.pdf [file 41598_2021_89176_MOESM1_ESM.pdf]

# Supplementary Material

## GWAS of allometric body-shape indices identifies loci suggesting associations with morphogenesis, organogenesis, adrenal cell renewal and cancer

Christakoudi S., Evangelou E., Riboli E., Tsilidis K.K.

### Supplementary Figures

|                                                                                                                                                                      |    |
|----------------------------------------------------------------------------------------------------------------------------------------------------------------------|----|
| Supplementary Fig. S1 Regression coefficients for independent significant SNPs associated with ABSI <sub>UKB</sub> or HI <sub>UKB</sub> .....                        | 3  |
| Supplementary Fig. S2 Differences between independent significant SNPs associated with ABSI <sub>UKB</sub> and HI <sub>UKB</sub> .....                               | 4  |
| Supplementary Fig. S3 Sex differences between independent significant SNPs associated with allometric body-shape indices.....                                        | 5  |
| Supplementary Fig. S4 Independent significant SNPs previously reported in association with cancer.....                                                               | 6  |
| Supplementary Fig. S5 Significant genes identified for allometric body shape indices previously reported in association with cancer .....                            | 7  |
| Supplementary Fig. S6 Regression coefficient ranking of independent significant SNPs: comparison between pairs of traditional and allometric body-shape indices..... | 8  |
| Supplementary Fig. S7 Differences between independent significant SNPs associated with allometric and traditional body-shape indices in women.....                   | 9  |
| Supplementary Fig. S8 Differences between independent significant SNPs associated with allometric and traditional body-shape indices in men .....                    | 10 |
| Supplementary Fig. S9 Independent significant SNPs in women previously reported in association with height.....                                                      | 11 |

|                                                                                                                                            |    |
|--------------------------------------------------------------------------------------------------------------------------------------------|----|
| Supplementary Fig. S10 Independent significant SNPs in men previously reported in association with height .....                            | 12 |
| Supplementary Fig. S11 Significant genes identified for allometric body shape indices previously reported in association with height ..... | 13 |

## Supplementary Tables

|                                                                                                                                                                  |    |
|------------------------------------------------------------------------------------------------------------------------------------------------------------------|----|
| Supplementary Table S1 Demographics and anthropometry of study participants.....                                                                                 | 14 |
| Supplementary Table S2 Top lead SNPs associated with allometric body-shape indices and corresponding candidate SNPs reported in the NHGRI-EBI GWAS Catalog ..... | 15 |
| Supplementary Table S3 Match of SNPs and genes identified in the current study against the NHGRI-EBI GWAS Catalog .....                                          | 18 |
| Supplementary Table S4 Highest ranked lead genes associated with allometric body-shape indices.....                                                              | 20 |
| Supplementary Table S5 Pearson's partial correlation coefficients between anthropometric measures and indices .....                                              | 22 |
| Supplementary Table S6 Regression coefficients of models used to calibrate allometric body-shape indices for UK Biobank participants .....                       | 23 |
| Supplementary Table S7 Genetic variant exclusions defining the genetic relationship matrix .....                                                                 | 24 |
| Supplementary Table S8 Bayesian mixed-model analysis BOLT-LMM quality control .....                                                                              | 25 |
| Supplementary Table S9 Candidate SNPs identified with FUMA.....                                                                                                  | 27 |
| Supplementary Table S10 Results from FUMA and MAGMA .....                                                                                                        | 29 |
| Supplementary Table S11 GWAS Summary statistics for all candidate SNPs .....                                                                                     | 36 |

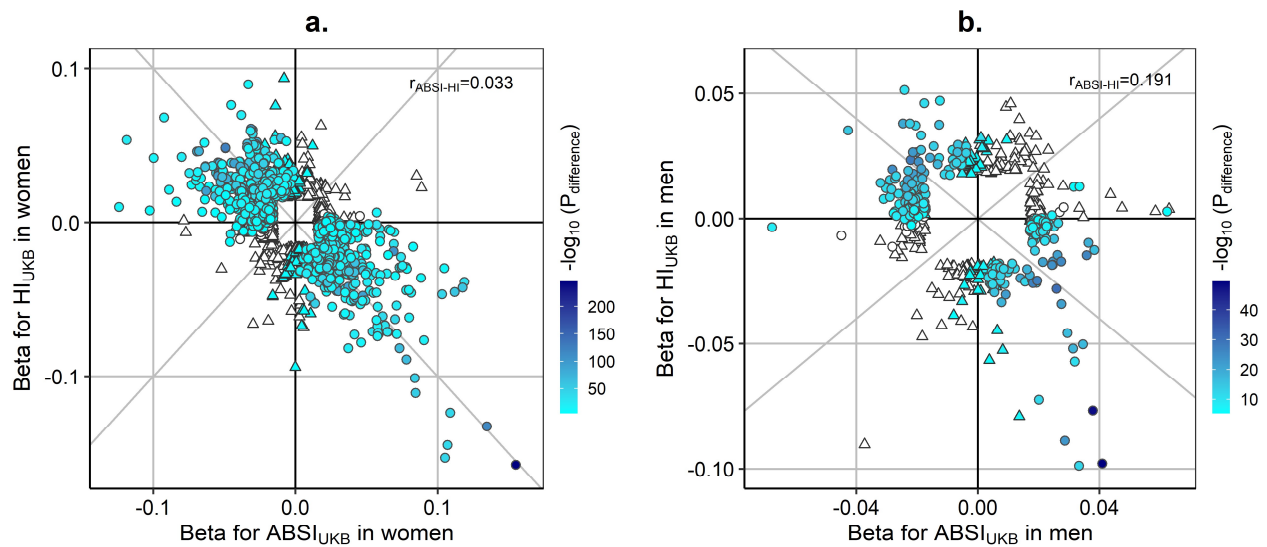

**Supplementary Fig. S1 Regression coefficients for independent significant SNPs associated with  $ABSI_{UKB}$  or  $HI_{UKB}$**

**(a)** – 1,273 independent significant SNPs (with genome-wide significance ( $p < 5 * 10^{-8}$ ) and in approximate linkage equilibrium with each other at  $r^2 < 0.6$ ) associated with  $ABSI_{UKB}$  and 814 associated with  $HI_{UKB}$  in women (1,969 unique SNPs, with 1,496 (76%, colour-coded) showing a difference in effect size between  $ABSI_{UKB}$  and  $HI_{UKB}$  at  $P_{\text{difference}} < 5 * 10^{-6}$ ); **(b)** – 266 independent significant SNPs associated with  $ABSI_{UKB}$  and 222 associated with  $HI_{UKB}$  in men (484 unique SNPs, with 306 (63%, colour-coded) showing significant differences);  **$ABSI_{UKB}$**  – a body shape index calibrated for UK Biobank participants;  **$HI_{UKB}$**  – hip index calibrated for UK Biobank participants; **SNPs** – single nucleotide polymorphisms;  **$WHI_{UKB}$**  – waist-to-hip index calibrated for UK Biobank participants;  **$r_{ABSI-HI}$**  – Spearman's rank correlation coefficient of the association between regression coefficients for  $ABSI_{UKB}$  and  $HI_{UKB}$  across all examined genetic variants (used in the test for difference of effect size); **circles** – SNPs with genome-wide significance for  $WHI_{UKB}$ ; **triangles** – SNPs with genome-wide significance only for  $ABSI_{UKB}$  or  $HI_{UKB}$ . Association statistics were derived from BOLT-LMM infinitesimal models.

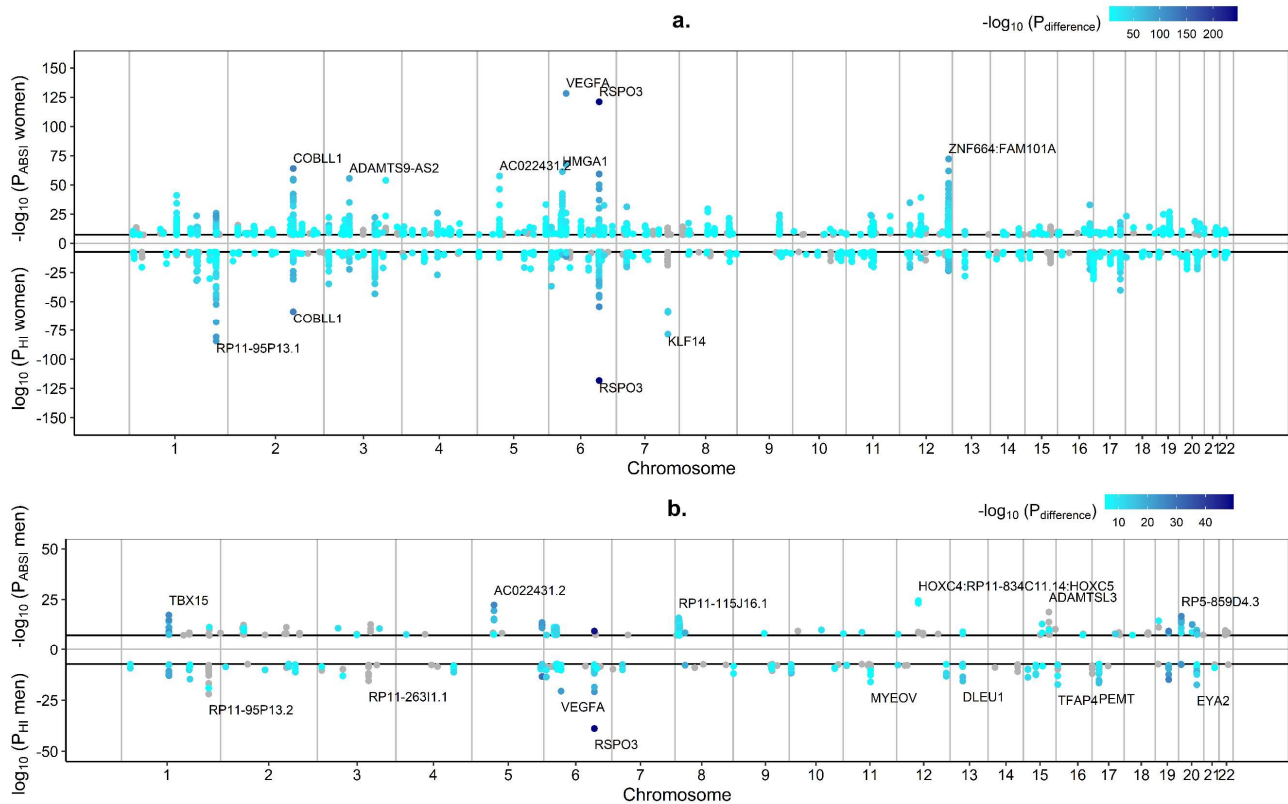

### Supplementary Fig. S2 Differences between independent significant SNPs associated with $\text{ABSI}_{\text{UKB}}$ and $\text{HI}_{\text{UKB}}$

**(a)** – 1,273 independent significant SNPs (with genome-wide significance and in approximate linkage equilibrium with each other at  $r^2 < 0.6$ ) associated with  $\text{ABSI}_{\text{UKB}}$  and 814 associated with  $\text{HI}_{\text{UKB}}$  in women; **(b)** – 266 independent significant SNPs associated with  $\text{ABSI}_{\text{UKB}}$  and 222 associated with  $\text{HI}_{\text{UKB}}$  in men;  **$\text{ABSI}_{\text{UKB}}$**  – a body shape index calibrated for UK Biobank participants;  **$\text{HI}_{\text{UKB}}$**  – hip index calibrated for UK Biobank participants; **SNP** – single nucleotide polymorphism;  **$P_{\text{WHI}} / \text{ABSI} / \text{HI}$**  – p-values for body-shape indices, derived from BOLT-LMM infinitesimal models; **horizontal lines** – genome-wide significance cut-off ( $p = 5 \times 10^{-8}$ ); **colour-scale** – independent significant SNPs showing difference in effect size between  $\text{ABSI}_{\text{UKB}}$  and  $\text{HI}_{\text{UKB}}$  at  $P_{\text{difference}} < 5 \times 10^{-6}$ .

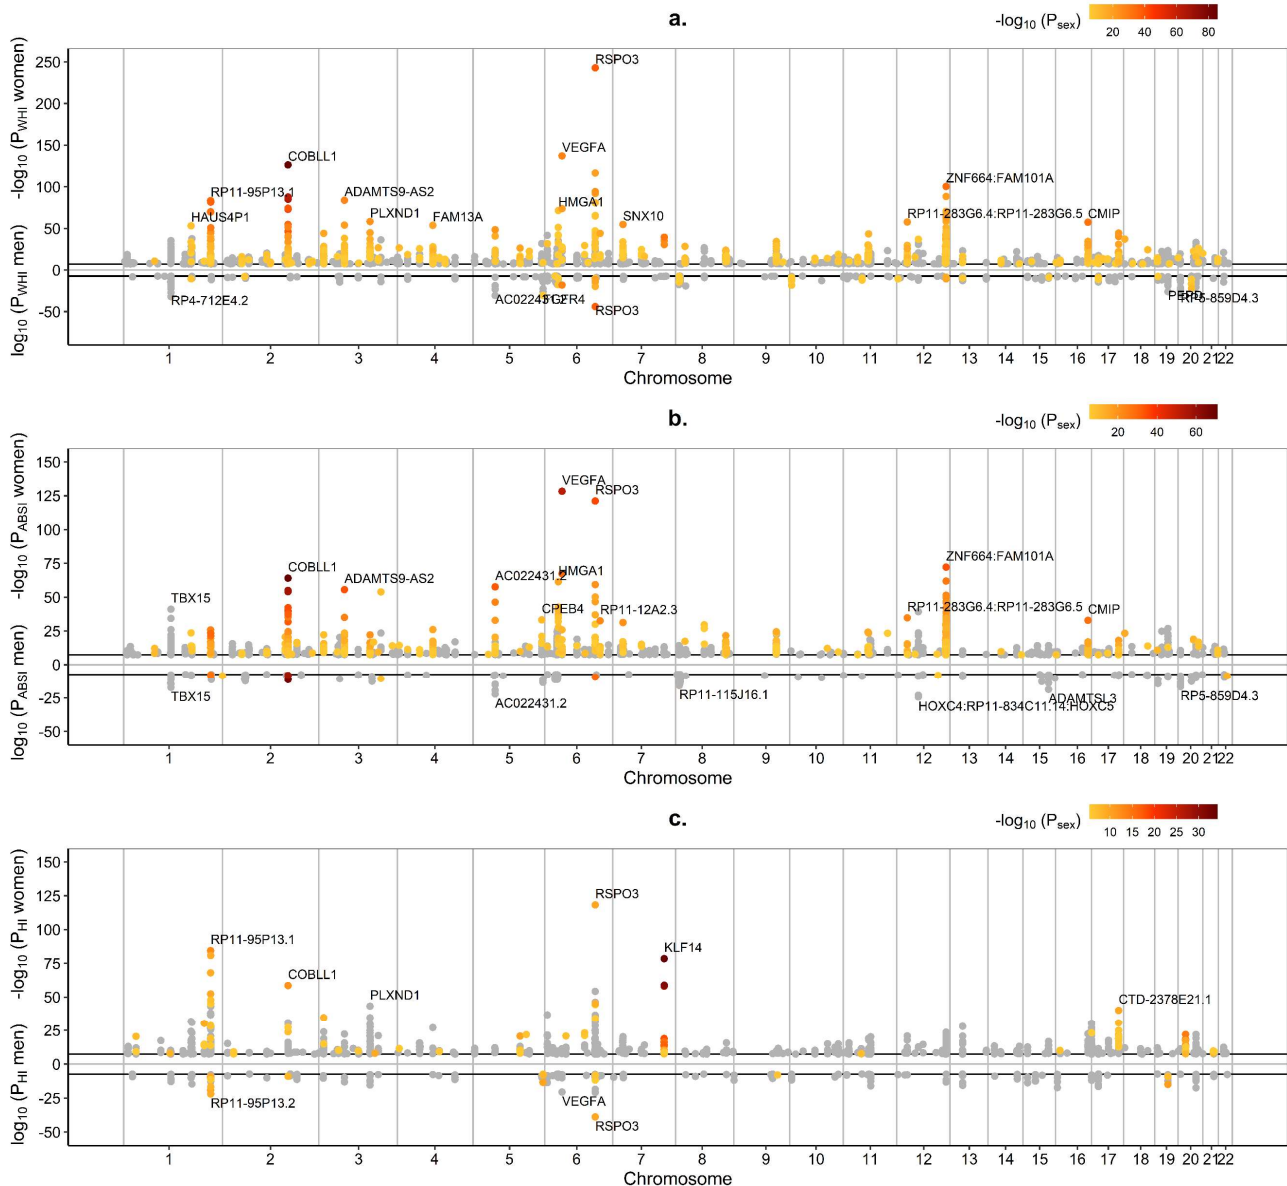

### Supplementary Fig. S3 Sex differences between independent significant SNPs associated with allometric body-shape indices

**(a)** – independent significant single nucleotide polymorphisms (SNPs) identified in this study with FUMA v.1.3.6a (with genome-wide significance and in approximate linkage equilibrium with each other at  $r^2 < 0.6$ ) for the waist-to-hip index (**WHI**) calibrated for UK Biobank participants (1,988 in women; 617 in men); **(b)** – independent significant SNPs for a body shape index (**ABSI**) calibrated for UK Biobank participants (1,273 in women; 266 in men); **(c)** – independent significant SNPs for hip index (**HI**) calibrated for UK Biobank participants (814 in women; 222 in men);  $P_{\text{WHI/ABSI/HI}}$  – p-values for body-shape indices derived from BOLT-LMM infinitesimal models; **horizontal lines** – genome-wide significance cut-off ( $p = 5 \times 10^{-8}$ );  $P_{\text{sex}}$  – p-values for sex difference in effect size; **Colour scale** – colour-marked were independent significant SNPs with  $P_{\text{sex}} < 5 \times 10^{-6}$ .

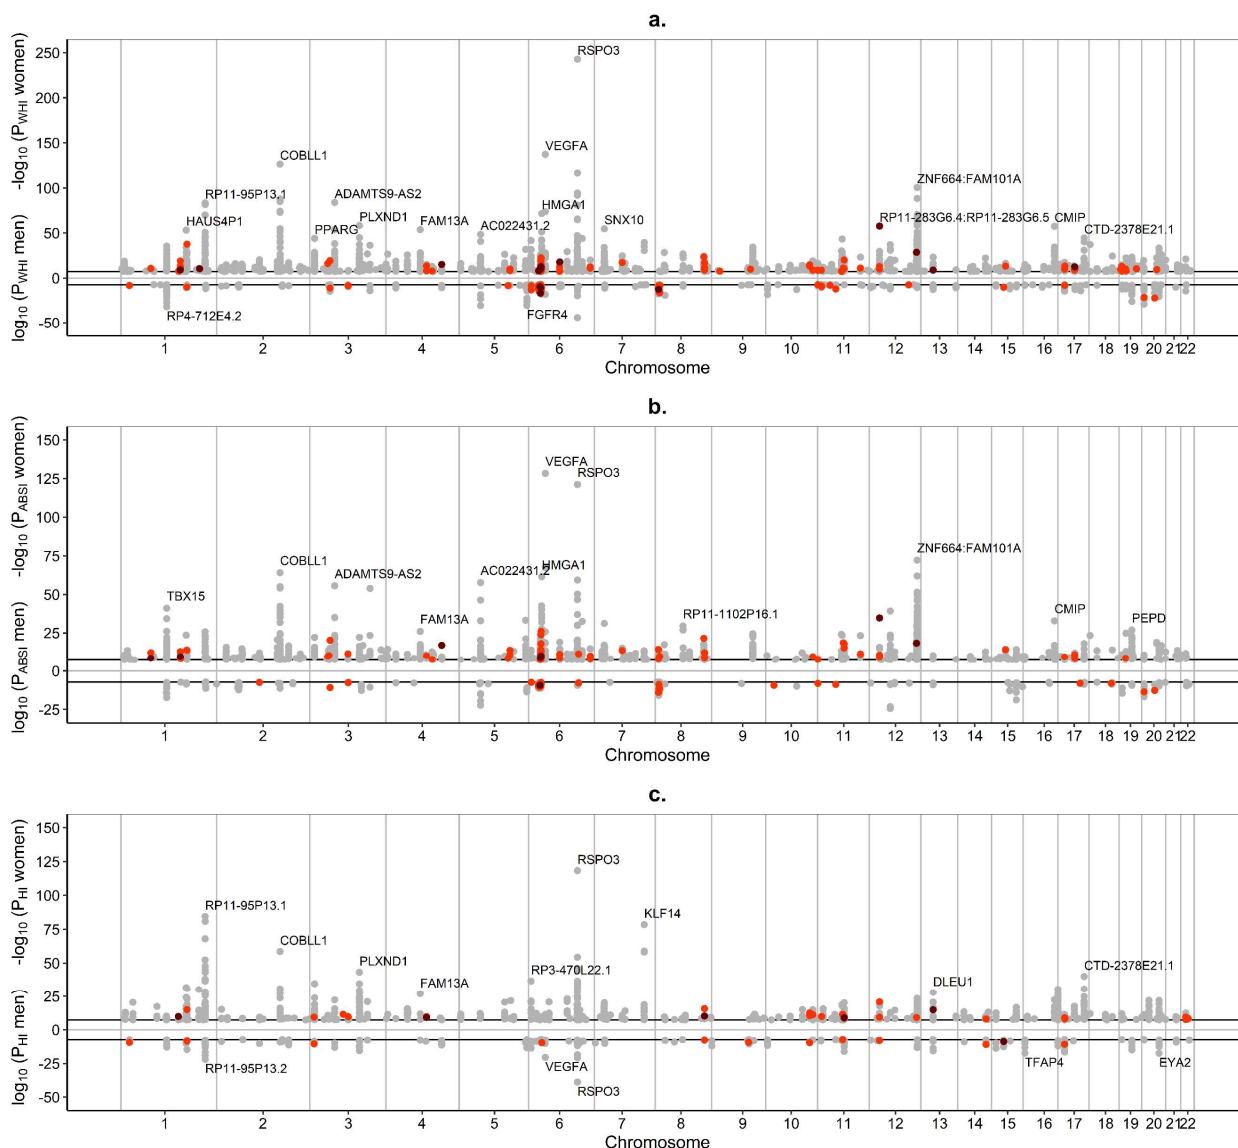

### Supplementary Fig. S4 Independent significant SNPs previously reported in association with cancer

**(a)** – independent significant single nucleotide polymorphisms (SNPs) identified with FUMA v.1.3.6a for waist-to-hip index (**WHI**) calibrated for UK Biobank participants (1,988 in women; 617 in men); **(b)** – independent significant SNPs for a body shape index (**ABSI**) calibrated for UK Biobank participants (1,273 in women; 266 in men); **(c)** – independent significant SNPs for hip index (**HI**) calibrated for UK Biobank participants (814 in women; 222 in men);  $P_{WHI/ABSI/HI}$  – p-values for body-shape indices derived from BOLT -LMM infinitesimal models; **horizontal lines** – genome-wide significance cut-off ( $p=5 \times 10^{-8}$ ). Independent significant SNPs identified in this study with FUMA v.1.3.6a (with genome-wide significance and in approximate linkage equilibrium with each other at  $r^2 < 0.6$ ) were matched against SNPs reported in the NHGRI-EBI GWAS Catalog [11] in association with cancer (<https://www.ebi.ac.uk/gwas/home>, accessed on 07/04/2021, catalogue set EFO\_0000311).

- (grey) – no reported association with cancer; ● (orange) – reported association with cancer for a candidate SNP in high linkage disequilibrium with the independent significant SNP at  $r^2 \geq 0.6$ ;
- (dark red) – reported association with cancer for the independent significant SNP.

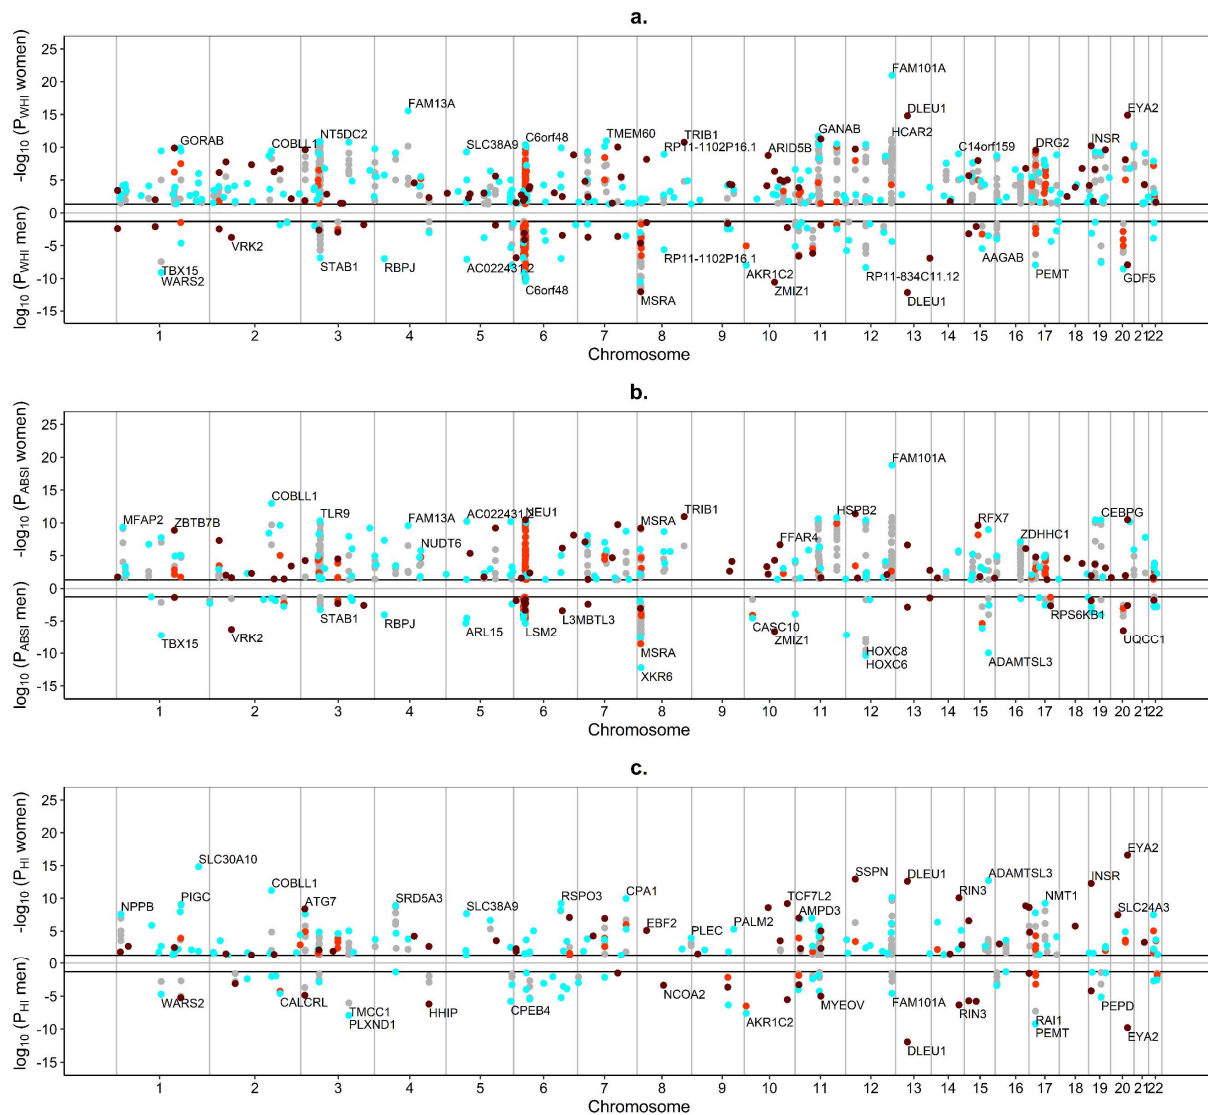

### Supplementary Fig. S5 Significant genes identified for allometric body shape indices previously reported in association with cancer

**(a)** – significant genes for waist-to-hip index (**WHI**) calibrated for UK Biobank participants (759 in women, 303 in men); **(b)** – significant genes for a body shape index (**ABSI**) calibrated for UK Biobank participants (584 in women, 183 in men); **(c)** – significant genes for hip index (**HI**) calibrated for UK Biobank participants (299 for women, 106 for men);  $P_{WHI/ABSI/HI}$  – p-values for body-shape indices derived from MAGMA v1.08 employed in FUMA v1.3.6a, with Bonferroni correction for multiple comparisons of 19,088 genes; **horizontal lines** – nominal significance cut-off ( $p=0.05$ ) for the adjusted p-values. Significant genes identified in this study within 250 kb of each other were consolidated in a genomic risk region represented by a lead gene (lowest p-value) and were matched against genes reported in the NHGRI-EBI GWAS Catalog [11] in association with cancer (catalogue set EFO\_0000311) (<https://www.ebi.ac.uk/gwas/home>, accessed on 07/04/2021).

● (grey) – significant gene with no reported association with cancer; ● (orange) – significant gene with reported association with cancer; ● (cyan) – lead gene with no reported association with cancer; ● (dark red) – lead gene with reported association with cancer.

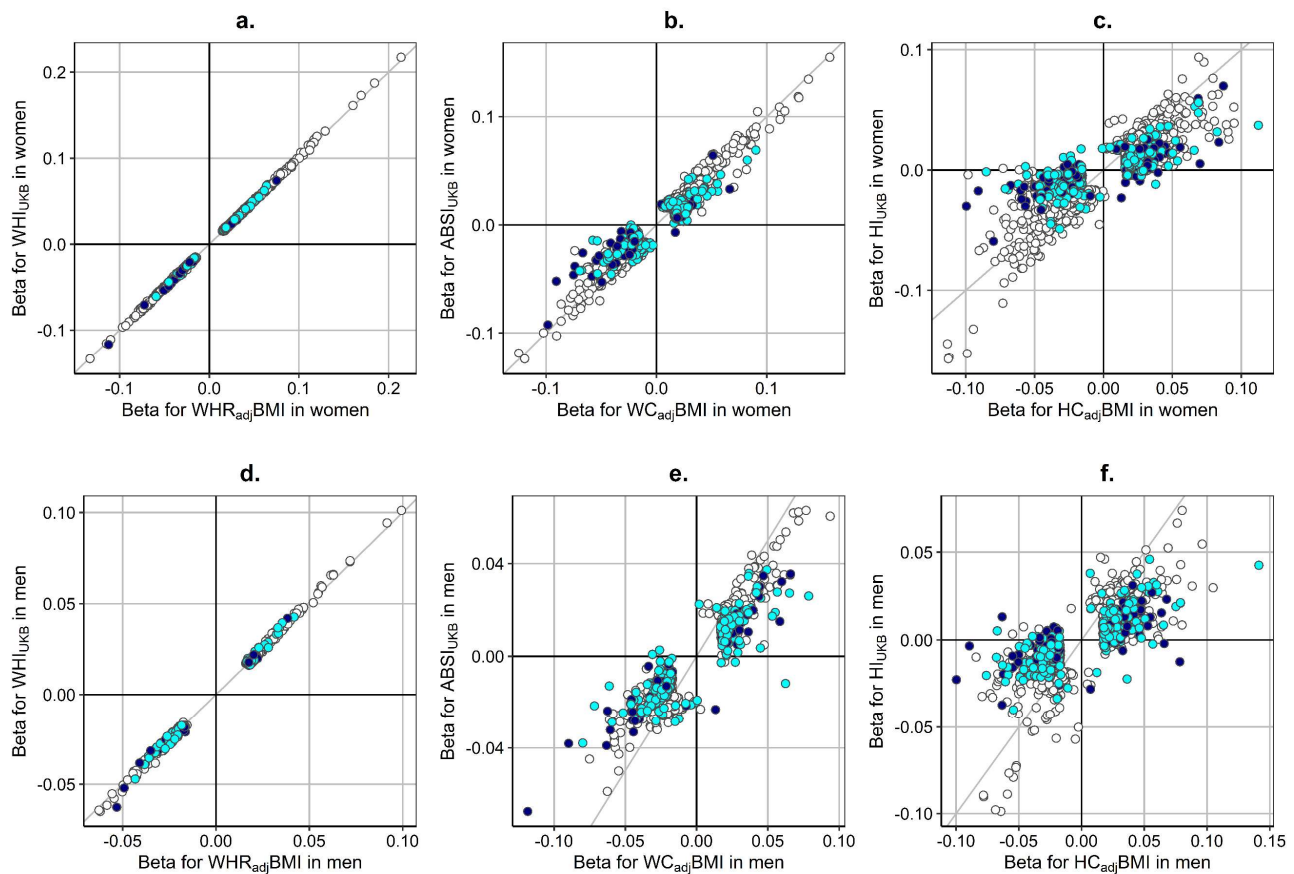

**Supplementary Fig. S6 Regression coefficient ranking of independent significant SNPs: comparison between pairs of traditional and allometric body-shape indices**

**(a)** – independent significant SNPs (at  $r^2 < 0.6$  within 1 Mb window) for WHI<sub>UKB</sub> (n=1,988) or WHR<sub>adj</sub>BMI (n=1,959) in women; **(b)** – independent significant SNPs for ABSI<sub>UKB</sub> (n=1,273) or WC<sub>adj</sub>BMI (n=1,586) in women; **(c)** – independent significant SNPs for HI<sub>UKB</sub> (n=814) or HC<sub>adj</sub>BMI (n=2,008) in women; **(d)** – independent significant SNPs for WHI<sub>UKB</sub> (n=617) or WHR<sub>adj</sub>BMI (n=571) in men; **(e)** – independent significant SNPs for ABSI<sub>UKB</sub> (n=266) or WC<sub>adj</sub>BMI (n=842) in men; **(f)** – independent significant SNPs for HI<sub>UKB</sub> (n=222) or HC<sub>adj</sub>BMI (1,400) in men. Regression coefficients (Beta) were derived from BOLT-LMM infinitesimal models.

**ABSI<sub>UKB</sub>** – a body shape index calibrated for UK Biobank participants; **BMI** – body mass index; **HC<sub>adj</sub>BMI** – hip circumference adjusted for BMI; **HI<sub>UKB</sub>** – hip index calibrated for UK Biobank participants; **SNP** – single nucleotide polymorphism; **WC<sub>adj</sub>BMI** – waist circumference adjusted for BMI; **WHR<sub>adj</sub>BMI** – waist-to-hip ratio adjusted for BMI; **WHI<sub>UKB</sub>** – waist-to-hip index calibrated for UK Biobank participants. **Colour scale** – colour-marked were only SNPs reported as associated with height in the NHGRI-EBI GWAS Catalog [11] (<https://www.ebi.ac.uk/gwas/home>, accessed on 07/04/2021), i.e. included in catalogue sets EFO\_0004339 or EFO\_0004302; ● (navy) – independent significant SNP reported in association with height; ● (cyan) – independent significant SNP in strong LD (at  $r^2 \geq 0.6$ ) with a SNP reported in association with height.



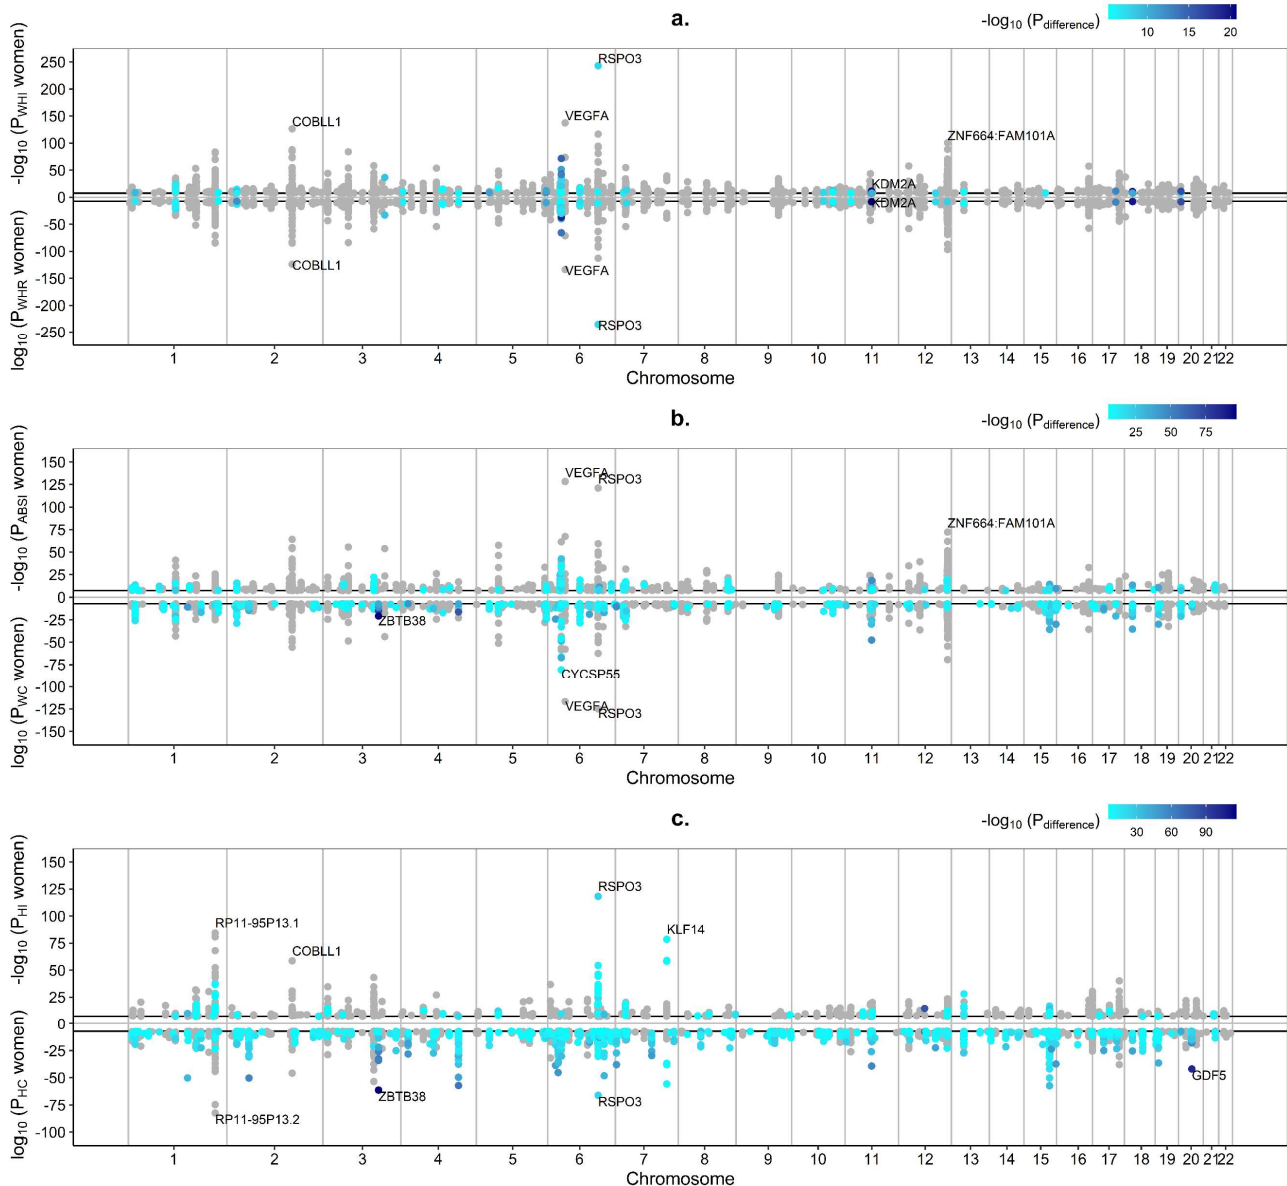

### Supplementary Fig. S7 Differences between independent significant SNPs associated with allometric and traditional body-shape indices in women

**(a)** – independent significant single nucleotide polymorphisms (SNPs) identified in this study with FUMA v. 1.3.6a (with genome-wide significance and in approximate linkage equilibrium with each other at  $r^2 < 0.6$ ) for waist-to-hip index (**WHI**) calibrated for UK Biobank participants ( $n=1,988$ ) and the waist-to-hip ratio (**WHR**) adjusted for body mass index (BMI) ( $n=1,959$ ); **(b)** – independent significant SNPs for a body shape index (**ABSI**) calibrated for UK Biobank participants ( $n=1,273$ ) and waist circumference (**WC**) adjusted for BMI ( $n=1,586$ ); **(c)** – independent significant SNPs for hip index (**HI**) calibrated for UK Biobank participants ( $n=814$ ) and hip circumference (**HC**) adjusted for BMI ( $n=2,008$ );  $P_{WHI / WHR / ABSI / WC / HI / HC}$  – p-values for body-shape indices derived from BOLT-LMM infinitesimal models; **horizontal lines** – genome-wide significance cut-off ( $p=5 \times 10^{-8}$ );  $P_{\text{difference}}$  – p-values for difference in effect size from the alternative index; **Colour scale** – colour-marked were independent significant SNPs with  $P_{\text{difference}} < 5 \times 10^{-6}$ .

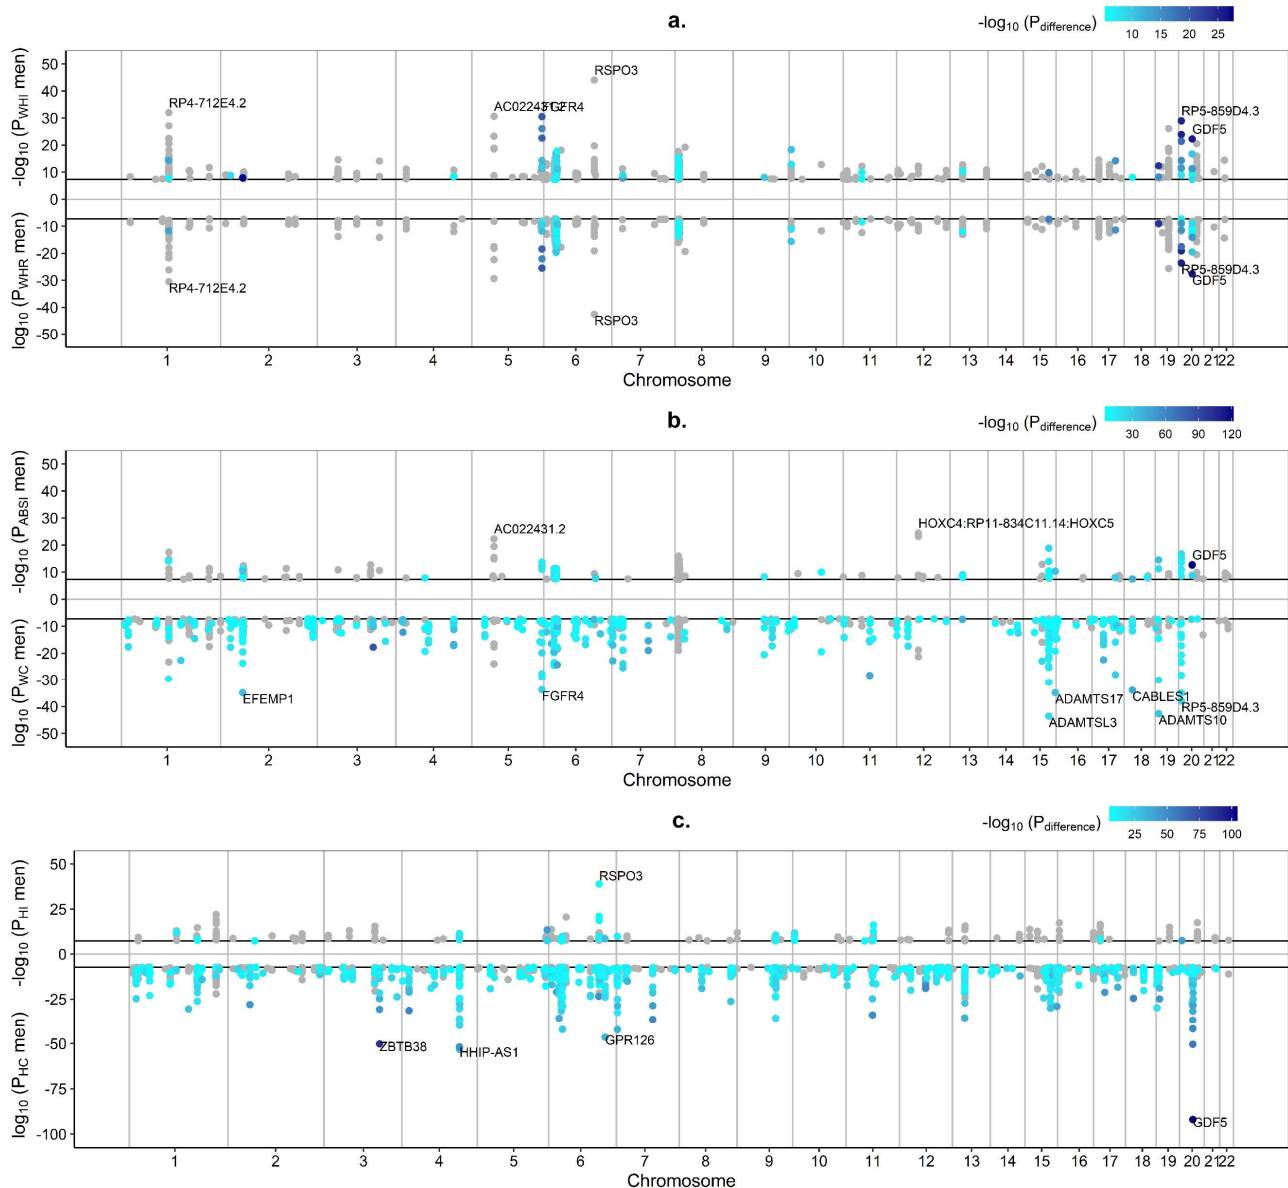

### Supplementary Fig. S8 Differences between independent significant SNPs associated with allometric and traditional body-shape indices in men

**(a)** – independent significant single nucleotide polymorphisms (SNPs) identified in this study with FUMA v.1.3.6a (with genome-wide significance and in approximate linkage equilibrium with each other at  $r^2 < 0.6$ ) for waist-to-hip index (**WHI**) calibrated for UK Biobank participants ( $n=617$ ) and for the waist-to-hip ratio (**WHR**) adjusted for body mass index (BMI) ( $n=571$ ); **(b)** – independent significant SNPs for a body shape index (**ABSI**) calibrated for UK Biobank participants ( $n=266$ ) and for waist circumference (**WC**) adjusted for BMI ( $n=842$ ); **(c)** – independent significant SNPs for hip index (**HI**) calibrated for UK Biobank participants ( $n=222$ ) and for hip circumference (**HC**) adjusted for BMI ( $n=1400$ );  $P_{\text{WHI/WHR/ABSI/WC/HI/HC}}$  – p-values for body-shape indices derived from BOLT-LMM infinitesimal models; **horizontal lines** – genome-wide significance cut-off ( $p=5 \times 10^{-8}$ );  $P_{\text{difference}}$  – p-values for difference in effect size from the alternative index; **Colour scale** – colour-marked were independent significant SNPs with  $P_{\text{difference}} < 5 \times 10^{-6}$ .

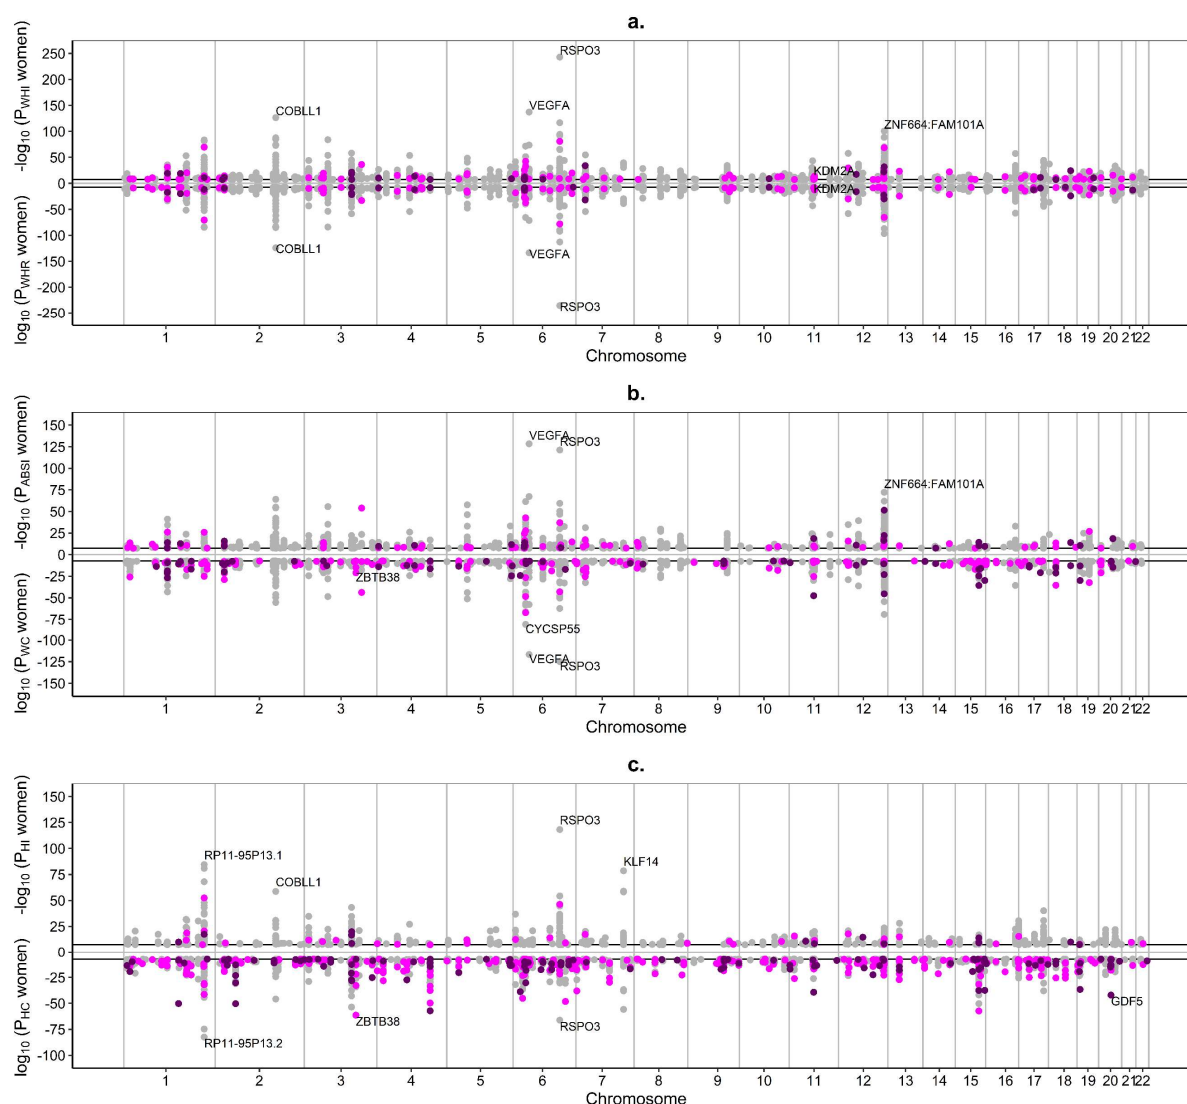

### Supplementary Fig. S9 Independent significant SNPs in women previously reported in association with height

**(a)** – independent significant single nucleotide polymorphisms (SNPs) identified with FUMA v.1.3.6a for waist-to-hip index (**WHI**) calibrated for UK Biobank participants ( $n=1,988$ ) and for the waist-to-hip ratio (**WHR**) adjusted for body mass index (BMI) ( $n=1,959$ ); **(b)** – independent significant SNPs for a body shape index (**ABSI**) calibrated for UK Biobank participants ( $n=1,273$ ) and for waist circumference (**WC**) adjusted for BMI ( $n=1,586$ ); **(c)** – independent significant SNPs for hip index (**HI**) calibrated for UK Biobank participants ( $n=814$ ) and for hip circumference (**HC**) adjusted for BMI ( $n=2,008$ );  $P_{\text{WHI/WHR/ABSI/WC/HI/HC}}$  – p-values for body-shape indices derived from BOLT -LMM infinitesimal models; **horizontal lines** – genome-wide significance cut-off ( $p=5 \times 10^{-8}$ ). Independent significant SNPs identified in this study with FUMA v.1.3.6a (with genome-wide significance and in approximate linkage equilibrium with each other at  $r^2 < 0.6$ ) were matched against SNPs reported in the NHGRI-EBI GWAS Catalog [11] in association with height (<https://www.ebi.ac.uk/gwas/home>, accessed on 07/04/2021, catalogue sets EFO\_0004339, EFO\_0004302).

- (grey) – no reported association with height;
- (light magenta) – reported association with height for a candidate SNP in high linkage disequilibrium ( $r^2 \geq 0.6$ );
- (dark magenta) – reported association with height for the independent significant SNP.

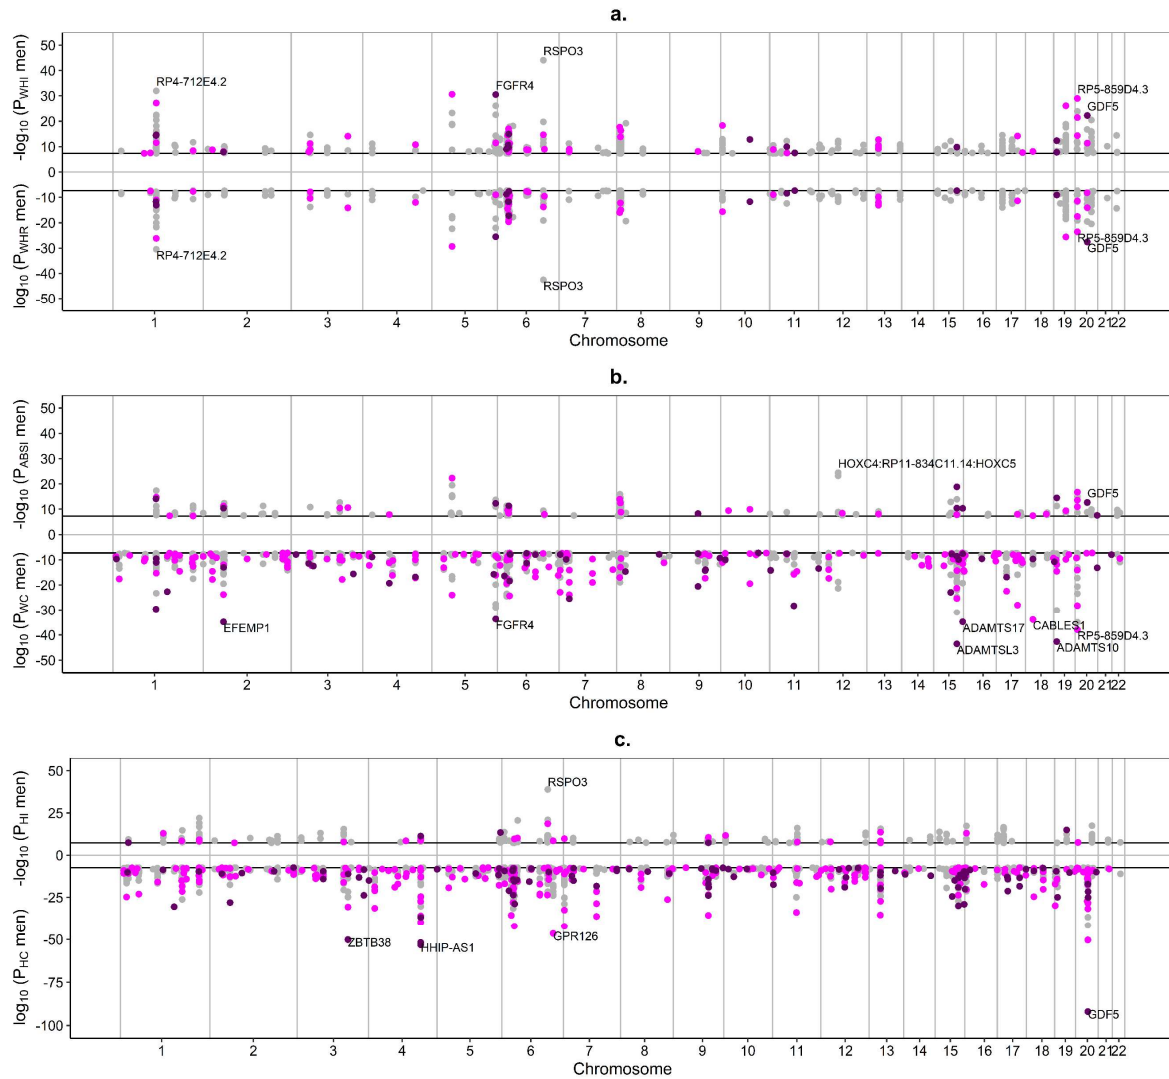

### Supplementary Fig. S10 Independent significant SNPs in men previously reported in association with height

(a) – independent significant single nucleotide polymorphisms (SNPs) identified with FUMA v.1.3.6a (with genome-wide significance and in approximate linkage equilibrium with each other at  $r^2 < 0.6$ ) for waist-to-hip index (**WHI**) calibrated for UK Biobank participants ( $n=617$ ) and for the waist-to-hip ratio (**WHR**) adjusted for body mass index (BMI) ( $n=571$ ); (b) – independent significant SNPs for a body shape index (**ABSI**) calibrated for UK Biobank participants ( $n=266$ ) and for waist circumference (**WC**) adjusted for BMI ( $n=842$ ); (c) – independent significant SNPs for hip index (**HI**) calibrated for UK Biobank participants ( $n=222$ ) and for hip circumference (**HC**) adjusted for BMI ( $n=1400$ );  $P_{WHI/WHR/ABSI/WC/HI/HC}$  – p-values for body-shape indices derived from BOLT-LMM infinitesimal models; **horizontal lines** – genome-wide significance cut-off ( $p=5 \times 10^{-8}$ ). Independent significant SNPs identified in this study with FUMA v.1.3.6a (with genome-wide significance and in approximate linkage equilibrium with each other at  $r^2 < 0.6$ ) were matched against SNPs reported in the NHGRI-EBI GWAS Catalog [11] in association with height (<https://www.ebi.ac.uk/gwas/home>, accessed on 07/04/2021, catalogue sets EFO\_0004339, EFO\_0004302).

● (grey) – no reported association with height; ● (light magenta) – reported association with height for a candidate SNP in high linkage disequilibrium ( $r^2 \geq 0.6$ ); ● (dark magenta) – reported association with height for the independent significant SNP.

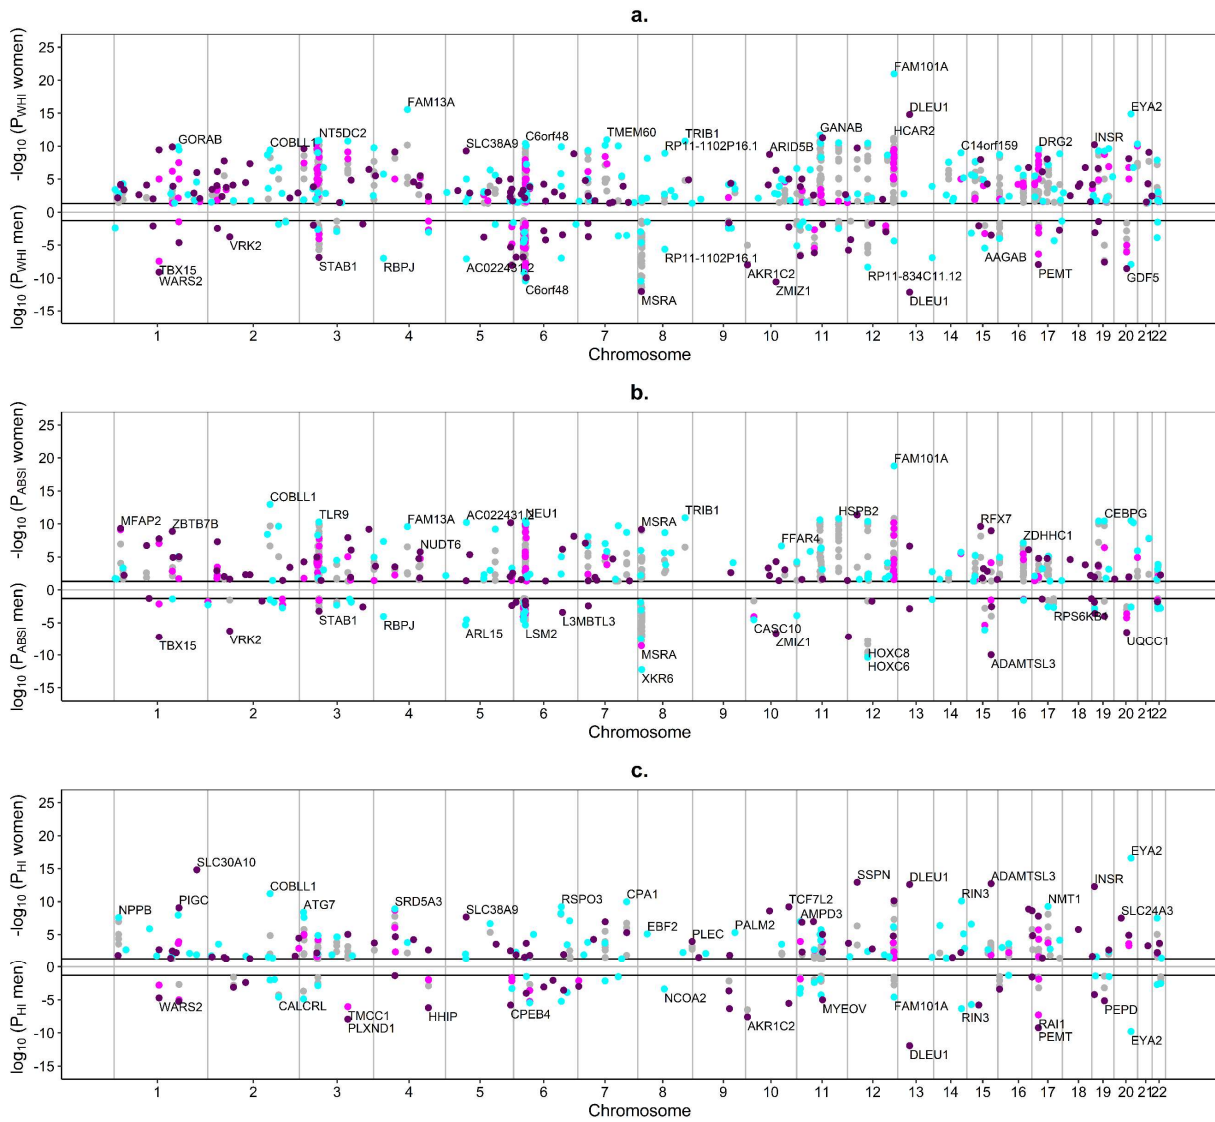

### Supplementary Fig. S11 Significant genes identified for allometric body shape indices previously reported in association with height

(a) – significant genes for waist-to-hip index (**WHI**) calibrated for UK Biobank participants (759 in women, 303 in men); (b) – significant genes for a body shape index (**ABSI**) calibrated for UK Biobank participants (584 in women, 183 in men); (c) – significant genes for hip index (**HI**) calibrated for UK Biobank participants (299 for women, 106 for men);  $P_{WHI/ABSI/HI}$  – p-values for body-shape indices derived from MAGMA v1.08 employed in FUMA v1.3.6a, with Bonferroni correction for multiple comparisons of 19,088 genes; **horizontal lines** – nominal significance cut-off ( $p=0.05$ ) for the adjusted p-values. Significant genes identified in this study within 250 kb of each other were consolidated in a genomic risk region represented by a lead gene (lowest p-value) and were matched against genes reported in the NHGRI-EBI GWAS Catalog [11] in association with height (catalogue sets EFO\_0004339, EFO\_0004302) (<https://www.ebi.ac.uk/gwas/home>, accessed on 07/04/2021).

● (grey) – significant gene with no reported association with height; ● (light magenta) – significant gene with reported association with height; ● (cyan) – lead gene with no reported association with height; ● (dark magenta) – lead gene with reported association with height.

**Supplementary Table S1 Demographics and anthropometry of study participants**

| Demographics                                                      | UK Biobank variable | Women         | Men           |
|-------------------------------------------------------------------|---------------------|---------------|---------------|
| Cohort: n                                                         |                     | 219,872       | 186,825       |
| UK BiLEVE Axiom Array: n (%)                                      | 22000-0.0           | 22,240 (10.1) | 22,310 (11.9) |
| Age at baseline: mean (SD)                                        | 21003-0.0           | 56.7 (7.9)    | 57.1 (8.1)    |
| <b>Anthropometric measures and traditional indices: mean (SD)</b> |                     |               |               |
| Height (cm)                                                       | 50-0.0              | 162.6 (6.2)   | 175.9 (6.7)   |
| Weight (kg)                                                       | 21002-0.0           | 71.5 (13.9)   | 86.2 (14.3)   |
| Body mass index (BMI) (kg/m <sup>2</sup> )                        | 21001-0.0           | 27.0 (5.1)    | 27.8 (4.2)    |
| Waist circumference (WC) (cm)                                     | 48-0.0              | 84.6 (12.5)   | 97.1 (11.3)   |
| Hip circumference (HC) (cm)                                       | 49-0.0              | 103.4 (10.3)  | 103.5 (7.6)   |
| Waist-to-hip ratio (WHR)                                          | <sup>1</sup>        | 0.82 (0.07)   | 0.94 (0.06)   |
| <b>Allometric indices: mean (SD)</b>                              |                     |               |               |
| A Body Shape Index (ABSI)                                         | <sup>2</sup>        | 73.9 (5.0)    | 79.8 (4.1)    |
| ABSI <sub>UKB</sub>                                               | <sup>3</sup>        | 62.1 (4.1)    | 71.2 (3.7)    |
| Hip Index (HI)                                                    | <sup>4</sup>        | 64.3 (2.5)    | 60.2 (2.2)    |
| HI <sub>UKB</sub>                                                 | <sup>5</sup>        | 81.4 (3.1)    | 46.4 (1.6)    |
| Waist-to-hip index (WHI)                                          | <sup>6</sup>        | 3.6 (0.3)     | 4.1 (0.2)     |
| WHI <sub>UKB</sub>                                                | <sup>7</sup>        | 4.5 (0.3)     | 7.3 (0.4)     |

<sup>1</sup> – calculated with variables 48-0.0 and 49-0.0; <sup>2</sup> – calculated with variables 48-0.0, 50-0.0 and 21002-0.0, using the published formula [ref. 5], which has been derived for participants in the National Health and Nutrition Examination Survey (NHANES); <sup>3</sup> – calculated with variables 48-0.0, 50-0.0 and 21002-0.0, using regression coefficients derived for UK Biobank participants included in the current study; <sup>4</sup> – calculated with variables 49-0.0, 50-0.0 and 21002-0.0, using the published formula [ref. 6], which has been derived for participants in NHANES; <sup>5</sup> – calculated with variables 49-0.0, 50-0.0 and 21002-0.0, using regression coefficients derived for UK Biobank participants included in the current study; <sup>6</sup> – calculated with variables 48-0.0, 49-0.0, 50-0.0 and 21002-0.0, using the regression coefficients from <sup>7</sup> rounded to the nearest proportion in the simplified formula  $WHR * [Weight(kg)/Height^2(cm)]^{-1/4}$ ; <sup>7</sup> – calculated with variables 48-0.0, 49-0.0, 50-0.0 and 21002-0.0, using regression coefficients derived for UK Biobank participants included in the current study; **SD** – standard deviation.

**Supplementary Table S2 Top lead SNPs associated with allometric body-shape indices and corresponding candidate SNPs reported in the NHGRI-EBI GWAS Catalog**

| SNP                             | CHR | Nearest genes                           | Beta   | P-value                | Allele | MAF  | Consequences             | r <sup>2</sup> | CADD |
|---------------------------------|-----|-----------------------------------------|--------|------------------------|--------|------|--------------------------|----------------|------|
| <b>WHI<sub>UKB</sub> women</b>  |     |                                         |        |                        |        |      |                          |                |      |
| rs72959041 <sup>a</sup>         | 6   | RSPO3                                   | 0.217  | 1.5*10 <sup>-243</sup> | A/G    | 0.05 | Intron, NCT              | -              | 2.9  |
| rs577721086                     | 6   | RSPO3                                   | 0.216  | 8.7*10 <sup>-243</sup> | C/T    | 0.05 | UTR                      | >0.99          | 17.6 |
| rs998584 <sup>a</sup>           | 6   | VEGFA                                   | 0.070  | 7.4*10 <sup>-138</sup> | A/C    | 0.48 | TFB-RR                   | -              | 12.4 |
| rs13389219 <sup>a</sup>         | 2   | COBLL1                                  | -0.069 | 5.2*10 <sup>-127</sup> | T/C    | 0.39 | NCT, TFB-RR              | -              | 9.1  |
| rs1128249                       | 2   | COBLL1                                  | -0.069 | 1.2*10 <sup>-126</sup> | T/G    | 0.39 | NCT, TFB-RR              | >0.99          | 15.6 |
| rs7978610 <sup>a</sup>          | 12  | ZNF664:FAM101A                          | -0.064 | 3.7*10 <sup>-101</sup> | C/G    | 0.33 | Intron, NCT, TFB-RR      | -              | 10.5 |
| rs11057401                      | 12  | CCDC92                                  | -0.060 | 5.2*10 <sup>-87</sup>  | A/T    | 0.31 | ExonM, NCT, TFB-RR       | 0.89           | 25.3 |
| rs2371767 <sup>a</sup>          | 3   | ADAMTS9-AS2                             | -0.062 | 1.5*10 <sup>-84</sup>  | C/G    | 0.27 | NCT                      | -              | 5.5  |
| rs9860730                       | 3   | ADAMTS9-AS2                             | -0.058 | 3.2*10 <sup>-78</sup>  | G/A    | 0.29 | NCT                      | 0.92           | 7.1  |
| <b>WHI<sub>UKB</sub> men</b>    |     |                                         |        |                        |        |      |                          |                |      |
| rs577721086 <sup>a</sup>        | 6   | RSPO3                                   | 0.101  | 9.6*10 <sup>-45</sup>  | C/T    | 0.05 | UTR                      | -              | 17.6 |
| rs6428789 <sup>a</sup>          | 1   | RP4-712E4.2                             | -0.038 | 1.1*10 <sup>-32</sup>  | A/C    | 0.43 | Intergenic               | -              | 8.5  |
| rs465983 <sup>a</sup>           | 5   | AC022431.2                              | 0.043  | 2.4*10 <sup>-31</sup>  | G/A    | 0.24 | Intron                   | -              | 6.9  |
| rs1966265 <sup>a</sup>          | 5   | FGFR4                                   | 0.042  | 3.2*10 <sup>-31</sup>  | A/G    | 0.25 | ExonM, NMDt, NCT, TFB-RR | -              | 6.2  |
| rs2145271 <sup>a</sup>          | 20  | RP5-859D4.3                             | 0.037  | 1.1*10 <sup>-29</sup>  | T/A    | 0.36 | Intergenic               | -              | 11.5 |
| <b>ABSI<sub>UKB</sub> women</b> |     |                                         |        |                        |        |      |                          |                |      |
| rs998584 <sup>a</sup>           | 6   | VEGFA                                   | 0.069  | 5.6*10 <sup>-129</sup> | A/C    | 0.48 | TFB-RR                   | -              | 12.4 |
| rs72959041 <sup>a</sup>         | 6   | RSPO3                                   | 0.155  | 8.3*10 <sup>-122</sup> | A/G    | 0.05 | Intron, NCT              | -              | 2.9  |
| rs7978610 <sup>a</sup>          | 12  | ZNF664,FAM101A                          | -0.055 | 6.7*10 <sup>-73</sup>  | C/G    | 0.33 | Intron, NCT, TFB-RR      | -              | 10.5 |
| rs1128249 <sup>b</sup>          | 2   | COBLL1                                  | -0.049 | 9.1*10 <sup>-65</sup>  | T/G    | 0.39 | NCT, TFB-RR              | -              | 15.6 |
| rs10195252                      | 2   | COBLL1                                  | -0.049 | 4.6*10 <sup>-63</sup>  | C/T    | 0.41 | NCT                      | 0.94           | 0.67 |
| rs551980123 <sup>b</sup>        | 6   | HMGA1                                   | 0.117  | 4.2*10 <sup>-62</sup>  | TG/T   | 0.04 | Intron, NCT, TFB-RR      | -              | 11.5 |
| rs9689096                       | 6   | CYCSP55                                 | 0.097  | 7.6*10 <sup>-62</sup>  | C/A    | 0.06 | Intergenic               | 0.71           | 0.01 |
| rs78114378                      | 6   | CYCSP55                                 | 0.110  | 1.7*10 <sup>-61</sup>  | A/G    | 0.05 | Intergenic               | 0.97           | 0.2  |
| <b>ABSI<sub>UKB</sub> men</b>   |     |                                         |        |                        |        |      |                          |                |      |
| rs61921797 <sup>b</sup>         | 12  | HOXC4, <sup>§</sup> ,HOXC5              | 0.033  | 3.8*10 <sup>-25</sup>  | A/G    | 0.37 | NCT, Intron, UTR         | -              | 7.4  |
| rs2071449                       | 12  | <sup>§</sup> HOXC4, <sup>§</sup> ,HOXC5 | 0.033  | 4.0*10 <sup>-25</sup>  | A/C    | 0.36 | Intron, NCT, TFB-RR      | >0.99          | 2.3  |
| rs754133                        | 12  | <sup>§</sup> HOXC6,HOXC4, <sup>§</sup>  | 0.033  | 1.0*10 <sup>-24</sup>  | A/G    | 0.36 | Intron, NCT, TFB-RR      | 0.95           | 17.1 |
| rs10876528                      | 12  | <sup>§</sup> HOXC6,HOXC4, <sup>§</sup>  | 0.033  | 1.4*10 <sup>-24</sup>  | A/C    | 0.36 | Intron, NCT              | 0.98           | 9.3  |
| rs2077177                       | 12  | <sup>§</sup> HOXC6,HOXC4, <sup>§</sup>  | 0.03   | 6.2*10 <sup>-22</sup>  | C/T    | 0.40 | Intron, NCT, TFB-RR      | 0.80           | 6.4  |
| rs157512 <sup>b</sup>           | 5   | AC022431.2                              | 0.036  | 5.0*10 <sup>-23</sup>  | C/T    | 0.24 | Intron                   | -              | 1.9  |
| rs30351                         | 5   | AC022431.1                              | 0.034  | 6.8*10 <sup>-22</sup>  | G/A    | 0.25 | Intergenic               | 0.90           | 0.5  |
| rs7162542 <sup>a</sup>          | 15  | ADAMTSL3                                | -0.028 | 1.5*10 <sup>-19</sup>  | C/G    | 0.44 | Intron, NCT, TFB-RR      | -              | 2.0  |
| rs4842838                       | 15  | ADAMTSL3                                | -0.025 | 1.0*10 <sup>-15</sup>  | G/T    | 0.47 | ExonM, NCT               | 0.72           | 9.0  |
| rs2030839                       | 15  | ADAMTSL3                                | -0.025 | 1.0*10 <sup>-15</sup>  | T/C    | 0.47 | Intron, NCT, TFB-RR      | 0.72           | 8.5  |
| rs8030379                       | 15  | ADAMTSL3                                | -0.025 | 1.1*10 <sup>-15</sup>  | G/A    | 0.47 | Intron, NCT              | 0.72           | 5.0  |
| rs10802069 <sup>a</sup>         | 1   | TBX15                                   | -0.028 | 4.5*10 <sup>-18</sup>  | T/C    | 0.39 | Intron                   | -              | 16.9 |
| rs2145271 <sup>b</sup>          | 20  | RP5-859D4.3                             | 0.027  | 1.8*10 <sup>-17</sup>  | T/A    | 0.37 | Intergenic               | -              | 11.5 |
| rs6054427                       | 20  | RP5-859D4.3                             | 0.027  | 2.5*10 <sup>-17</sup>  | G/A    | 0.38 | Intergenic               | 0.93           | 18.4 |
| rs979012                        | 20  | RP5-859D4.3                             | 0.027  | 3.2*10 <sup>-17</sup>  | T/C    | 0.37 | Intergenic               | >0.99          | 4.7  |
| rs1884897                       | 20  | RP5-859D4.3                             | 0.025  | 1.2*10 <sup>-14</sup>  | A/G    | 0.37 | TFB-RR                   | 0.88           | 13.0 |
| rs6107848                       | 20  | CASC20                                  | 0.025  | 2.0*10 <sup>-14</sup>  | A/G    | 0.37 | Intergenic               | 0.84           | 19.4 |
| <i>(continues)</i>              |     |                                         |        |                        |        |      |                          |                |      |

| SNP                             | CHR | Nearest genes                      | Beta   | P-value                | Allele | MAF  | Consequences                     | r2    | CADD |
|---------------------------------|-----|------------------------------------|--------|------------------------|--------|------|----------------------------------|-------|------|
| <b>HL<sub>UKB</sub> women</b>   |     |                                    |        |                        |        |      |                                  |       |      |
| <i>rs72959041</i> <sup>b</sup>  | 6   | <i>RSPO3</i>                       | -0.157 | 6.3*10 <sup>-119</sup> | A/G    | 0.05 | Intron, NCT                      | -     | 2.9  |
| <i>rs141783576</i>              | 6   | <i>RSPO3</i>                       | -0.121 | 5.5*10 <sup>-100</sup> | C/G    | 0.07 | UTR, TFB-RR                      | 0.66  | 15.6 |
| <i>rs2605098</i> <sup>a</sup>   | 1   | <i>RP11-95P13.1</i>                | 0.060  | 3.9*10 <sup>-85</sup>  | A/G    | 0.34 | Intergenic                       | -     | 0.1  |
| <i>rs748273</i>                 | 1   | <i>RP11-95P13.1</i>                | 0.059  | 3.10E-78               | A/G    | 0.31 | Intergenic                       | 0.83  | 8.3  |
| <i>rs4731702</i> <sup>b</sup>   | 7   | <i>KLF14</i>                       | 0.055  | 3.4*10 <sup>-79</sup>  | T/C    | 0.49 | Intergenic                       | -     | 0.1  |
| <i>rs13241538</i>               | 7   | <i>KLF14</i>                       | 0.055  | 5.8*10 <sup>-78</sup>  | C/G    | 0.49 | Intergenic                       | >0.99 | 0.3  |
| <i>rs17789506</i>               | 7   | <i>KLF14</i>                       | 0.055  | 1.2*10 <sup>-77</sup>  | A/G    | 0.49 | Intergenic                       | >0.99 | 3.1  |
| <i>rs13389219</i> <sup>b</sup>  | 2   | <i>COBLL1</i>                      | 0.049  | 2.7*10 <sup>-59</sup>  | T/C    | 0.39 | NCT, TFB-RR                      | -     | 9.1  |
| <i>rs10195252</i>               | 2   | <i>COBLL1</i>                      | 0.047  | 8.4*10 <sup>-57</sup>  | C/T    | 0.41 | NCT                              | 0.94  | 0.7  |
| <i>rs9840468</i> <sup>b</sup>   | 3   | <i>PLXND1</i>                      | 0.051  | 5.9*10 <sup>-44</sup>  | G/A    | 0.20 | NCT, TFB-RR                      | -     | 13.3 |
| <i>rs10804591</i>               | 3   | <i>PLXND1</i>                      | 0.048  | 2.0*10 <sup>-41</sup>  | C/A    | 0.22 | TFB-RR                           | 0.88  | 9.8  |
| <b>HL<sub>UKB</sub> men</b>     |     |                                    |        |                        |        |      |                                  |       |      |
| <i>rs72959041</i> <sup>b</sup>  | 6   | <i>RSPO3</i>                       | -0.098 | 1.3*10 <sup>-39</sup>  | A/G    | 0.05 | Intron, NCT                      | -     | 2.9  |
| <i>rs141783576</i>              | 6   | <i>RSPO3</i>                       | -0.077 | 9.8*10 <sup>-35</sup>  | C/G    | 0.07 | UTR, TFB-RR                      | 0.66  | 15.6 |
| <i>rs1415287</i> <sup>b</sup>   | 1   | <i>RP11-95P13.2</i>                | 0.034  | 1.1*10 <sup>-22</sup>  | T/C    | 0.30 | TFB-RR                           | -     | 1.7  |
| <i>rs2820443</i>                | 1   | <i>RP11-95P13.2</i>                | 0.034  | 1.9*10 <sup>-22</sup>  | C/T    | 0.30 | TFB-RR                           | >0.99 | 13.0 |
| <i>rs998584</i> <sup>c</sup>    | 6   | <i>VEGFA</i>                       | -0.030 | 2.9*10 <sup>-21</sup>  | A/C    | 0.48 | TFB-RR                           | -     | 12.4 |
| <i>rs6066114</i> <sup>c</sup>   | 20  | <i>EYA2</i>                        | -0.029 | 3.5*10 <sup>-18</sup>  | C/T    | 0.35 | Intron, NMDt                     | -     | 3.2  |
| <i>rs113733630</i> <sup>d</sup> | 16  | <i>TFAP4</i>                       | 0.032  | 4.7*10 <sup>-18</sup>  | #/A    | 0.24 | Intergenic                       | -     | 0.7  |
| <i>rs3747579</i>                | 16  | <i>CORO7</i><br><i>PAM16:CORO7</i> | -0.017 | 1.3*10 <sup>-6</sup>   | C/T    | 0.28 | ExonM, NMDt, UTR,<br>Intron, NCT | -     | 27.8 |

Shown are the five highest-ranked top lead SNP per index and sex identified with FUMA v1.3.6a (each corresponding to an independent genomic risk locus), in ascending order of their p-value.

<sup>a</sup> – top lead SNP previously reported in association with the corresponding traditional body-shape index (see matching algorithm below, additional reported SNPs from the same genetic risk locus are shown in the grey rows only if their CADD is larger); <sup>b</sup> – top lead SNP in strong linkage disequilibrium (at  $r^2 \geq 0.6$ ) with a previously reported candidate SNP (the grey rows show the previously reported SNPs from the LD block and when there is more than one, only those with higher CADD); <sup>c</sup> – novel top lead SNP, with no previously reported candidate SNPs included in the corresponding genetic risk locus; <sup>d</sup> – top lead SNP with a previously reported candidate SNP included in the corresponding genetic risk locus, but not in the same LD block (shown in the grey row); # – AGTTT; & – *RP11-834C11.12*; § – *RP11-834C11.14*; **ABS<sub>UKB</sub>** – a body shape index calibrated for UK Biobank participants; **Allele** – allele variants (minor allele first); **Beta** – regression coefficients reflecting the phenotype of the minor allele for the corresponding index, derived from BOLT-LMM infinitesimal models; **CADD** – Combined Annotation Dependent Depletion (deleteriousness) score; **ExonM** – exon missense; **Consequences** – correspond to annotation according to Ensembl Variance Effect Predictor (VEP) v.90 **HL<sub>UKB</sub>** – hip index calibrated for UK Biobank participants; **MAF** – minor allele frequency; **NCT** – non-coding transcript; **NMDt** – nonsense-mediated mRNA decay (NMD) target; **P-value** – derived from BOLT-LMM infinitesimal models; **r<sup>2</sup>** – maximum value of linkage disequilibrium with the top lead variant from <sup>a/b/c/d</sup> mapped to the same genetic region; **SNP** – single nucleotide polymorphism; **TFB-RR** – transcription factor



(TF) binding or regulatory region; **UTR** – untranslated region; **WHI<sub>UKB</sub>** – waist-to-hip index calibrated for UK Biobank participants.

SNPs identified in the current study for allometric body-shape indices were matched against SNPs reported in the NHGRI-EBI GWAS Catalog [ref. 11] (<https://www.ebi.ac.uk/gwas/home>, accessed on 07/04/2021) in association with the corresponding traditional body-shape index (with or without adjustment for body mass index), i.e. the waist-to-hip ratio for WHI<sub>UKB</sub> (catalogue sets EFO\_0004343, EFO\_0007788, EFO\_0004302), waist circumference for ABSI<sub>UKB</sub> (EFO\_0004342, EFO\_0007789, EFO\_0004302), or hip circumference for HI<sub>UKB</sub> (EFO\_0005093, EFO\_0008039, EFO\_0004302). Variants in locus *RP4-712E4.2* have previously been mapped to *AL139420.2* and *WARS2*, in locus *RP5-859D4.3* to *LINC01713* and *CASC20*, in locus *RP11-95P13.1* to *AL356364.1* and *LYPLAL1-AS1*, in locus *RP11-95P13.2* to *SLC30A10*, *AL356364.1* and *ZC3H11B* and in locus *AC022431.2* to *C5orf67*.

### Supplementary Table S3 Match of SNPs and genes identified in the current study against the NHGRI-EBI GWAS Catalog

| Catalogue set                                   | WHI <sub>UKB</sub> | WHR <sub>adj</sub> BMI | ABSI <sub>UKB</sub> | WC <sub>adj</sub> BMI | HI <sub>UKB</sub> | HC <sub>adj</sub> BMI |
|-------------------------------------------------|--------------------|------------------------|---------------------|-----------------------|-------------------|-----------------------|
| <b>Women</b>                                    |                    |                        |                     |                       |                   |                       |
| <b>Independent significant SNPs<sup>a</sup></b> |                    |                        |                     |                       |                   |                       |
| Total number                                    | 1,988              | 1,959                  | 1,273               | 1,586                 | 814               | 2,008                 |
| WHR <sub>adj</sub> BMI or WHR <sup>1</sup>      | 729 (37)           | 718 (37)               | 475 (37) ***        | 472 (30) ***          | 236 (29) ***      | 279 (14) ***          |
| WC <sub>adj</sub> BMI or WC <sup>2</sup>        | 292 (15)           | 270 (14)               | 278 (22) ***        | 478 (30) ***          | 87 (11)           | 253 (13)              |
| HC <sub>adj</sub> BMI or HC <sup>3</sup>        | 41 (2.1)           | 41 (2.1)               | 33 (2.6)            | 57 (3.6)              | 40 (4.9)          | 121 (6.0)             |
| VAT or fat distribution <sup>4</sup>            | 97 (4.9)           | 95 (4.8)               | 102 (8.0)           | 135 (8.5)             | 52 (6.4) *        | 196 (9.8) *           |
| BMI, weight or adipose tissue <sup>5</sup>      | 133 (6.7)          | 128 (6.5)              | 115 (9.0)           | 167 (11)              | 57 (7.0) *        | 208 (10) *            |
| Height <sup>6</sup>                             | 132 (6.6)          | 127 (6.5)              | 103 (8.1) ***       | 227 (14) ***          | 52 (6.4) ***      | 440 (22) ***          |
| <b>Significant genes<sup>b</sup></b>            |                    |                        |                     |                       |                   |                       |
| Total number                                    | 759                | 748                    | 584                 | 707                   | 299               | 923                   |
| WHR <sub>adj</sub> BMI or WHR <sup>1</sup>      | 342 (45)           | 337 (45)               | 251 (43)            | 270 (38)              | 126 (42) ***      | 219 (24) ***          |
| WC <sub>adj</sub> BMI or WC <sup>2</sup>        | 190 (25)           | 177 (24)               | 172 (29) *          | 262 (37) *            | 68 (23)           | 195 (21)              |
| HC <sub>adj</sub> BMI or HC <sup>3</sup>        | 50 (6.6)           | 49 (6.6)               | 35 (6.0)            | 63 (8.9)              | 33 (11)           | 90 (9.8)              |
| VAT or fat distribution <sup>4</sup>            | 103 (14)           | 101 (14)               | 90 (15)             | 129 (18)              | 57 (19)           | 170 (18)              |
| BMI, weight or adipose tissue <sup>5</sup>      | 172 (23)           | 169 (23)               | 136 (23)            | 187 (26)              | 89 (30)           | 231 (25)              |
| Height <sup>6</sup>                             | 196 (26)           | 188 (25)               | 141 (24) *          | 228 (32) *            | 96 (32) *         | 373 (40) *            |
| <b>Men</b>                                      |                    |                        |                     |                       |                   |                       |
| <b>Independent significant SNPs<sup>a</sup></b> |                    |                        |                     |                       |                   |                       |
| Total number                                    | 617                | 571                    | 266                 | 842                   | 222               | 1,400                 |
| WHR <sub>adj</sub> BMI or WHR <sup>1</sup>      | 173 (28)           | 161 (28)               | 64 (24) ***         | 106 (13) ***          | 103 (46) ***      | 157 (11) ***          |
| WC <sub>adj</sub> BMI or WC <sup>2</sup>        | 104 (17)           | 88 (15)                | 65 (24) *           | 283 (34) *            | 45 (20)           | 212 (15)              |
| HC <sub>adj</sub> BMI or HC <sup>3</sup>        | 20 (3.2)           | 18 (3.2)               | 19 (7.1)            | 61 (7.2)              | 22 (9.9)          | 110 (7.9)             |
| VAT or fat distribution <sup>4</sup>            | 76 (12)            | 69 (12)                | 62 (23) **          | 112 (13) **           | 28 (13)           | 181 (13)              |
| BMI, weight or adipose tissue <sup>5</sup>      | 66 (11)            | 60 (11)                | 44 (17)             | 120 (14)              | 37 (17) *         | 147 (10) *            |
| Height <sup>6</sup>                             | 64 (10)            | 55 (9.6)               | 40 (15) ***         | 235 (28) ***          | 30 (14) ***       | 373 (27) ***          |
| <b>Significant genes<sup>b</sup></b>            |                    |                        |                     |                       |                   |                       |
| Total number                                    | 303                | 312                    | 183                 | 421                   | 106               | 724                   |
| WHR <sub>adj</sub> BMI or WHR <sup>1</sup>      | 106 (35)           | 104 (33)               | 51 (28)             | 102 (24)              | 54 (51) ***       | 146 (20) ***          |
| WC <sub>adj</sub> BMI or WC <sup>2</sup>        | 72 (24)            | 71 (23)                | 45 (25) *           | 162 (38) *            | 32 (30) *         | 150 (21) *            |
| HC <sub>adj</sub> BMI or HC <sup>3</sup>        | 18 (5.9)           | 18 (5.8)               | 12 (6.6) *          | 51 (12) *             | 22 (21) *         | 86 (12) *             |
| VAT or fat distribution <sup>4</sup>            | 48 (16)            | 51 (16)                | 41 (22)             | 84 (20)               | 21 (20)           | 152 (21)              |
| BMI, weight or adipose tissue <sup>5</sup>      | 61 (20)            | 61 (20)                | 47 (26)             | 122 (29)              | 37 (35) *         | 175 (24) *            |
| Height <sup>6</sup>                             | 76 (25)            | 80 (26)                | 47 (26) ***         | 182 (43) ***          | 38 (36)           | 297 (41)              |

**ABSI<sub>UKB</sub>** – a body shape index calibrated for UK Biobank participants; **BMI** – body mass index; **HC<sub>adj</sub>BMI** – hip circumference adjusted for body mass index; **HI<sub>UKB</sub>** – hip index calibrated for UK Biobank participants; **SNP** – single nucleotide polymorphism; **VAT** – visceral adipose tissue; **WC<sub>adj</sub>BMI** – waist circumference adjusted for BMI; **WHR<sub>adj</sub>BMI** – waist-to-hip ratio adjusted for BMI; **WHI<sub>UKB</sub>** – waist-to-hip index calibrated for UK Biobank participants. Association statistics were derived from BOLT-LMM infinitesimal models.

<sup>a</sup> – defined according to FUMA v1.3.6a, i.e. with genome-wide significance at  $p < 5 \times 10^{-8}$  in the current study and in approximate linkage equilibrium with each other at  $r^2 < 0.6$ ; a match was counted if any candidate SNP from the corresponding LD block (with  $p < 0.05$ , within 1 Mb and in LD with the independent significant SNP at  $r^2 \geq 0.6$ ) was reported in the examined catalogue set.

<sup>b</sup> – identified with MAGMA v1.08 employed in FUMA v1.3.6a at significance  $P_{adj} < 0.05$ , incorporating Bonferroni correction for multiple comparisons for 19,088 protein-coding genes.

Independent significant SNPs and significant genes identified in the current study were matched against SNPs and genes reported in the NHGRI-EBI GWAS Catalog [ref. 11] (accessed on 07/04/2021, <https://www.ebi.ac.uk/gwas/home>) in association with anthropometric measures and indices.

Catalogue sets were as follows (**n** – number of variants; **s** – number of studies in the set):

- <sup>1</sup> EFO\_0004343 waist-to-hip ratio (n=4,740, s=87); EFO\_0007788 BMI-adjusted waist-to-hip ratio (n=3,177, s=46);
- <sup>2</sup> EFO\_0004342 waist circumference (n=3,211, s=43); EFO\_0007789 BMI-adjusted waist circumference (n=2744, s=15);
- <sup>3</sup> EFO\_0005093 hip circumference (HC) (n=690, s=11); EFO\_0008039 BMI-adjusted hip circumference (n=374, s=2);
- <sup>4</sup> EFO\_0004341 body fat distribution (n=526, s=6); EFO\_0004765 visceral adipose tissue measurement (n=360, s=26); EFO\_0004767 visceral/subcutaneous adipose tissue ratio (n=54, s=12); EFO\_0005106 body composition measurement (n=897, s=23);
- <sup>5</sup> EFO\_0004338 body weight (n=848, s=44); EFO\_0004340 body mass index (BMI) (n=7,876, s=194); EFO\_0004764 adipose tissue measurement (n=532, s=66); EFO\_0004766 subcutaneous adipose tissue measurement (n=65, s=14); EFO\_0005409 fat body mass (n=231, s=14); EFO\_0007800 body fat percentage (n=298, s=16);
- <sup>6</sup> EFO\_0004339 body height (Height) (n=5,514, s=56);

In addition, entries from set EFO\_0004302 anthropometric measurement (n=26,484, s=585) were allocated to the corresponding index.

**Supplementary Table S4 Highest ranked lead genes associated with allometric body-shape indices**

| Lead gene                      | CHR | Start BP  | Stop BP   | kb   | nGenes | nSNPs | P <sub>adj</sub>      | Catalog | Height | Cancer |
|--------------------------------|-----|-----------|-----------|------|--------|-------|-----------------------|---------|--------|--------|
| <b>WHI<sub>UKB</sub> women</b> |     |           |           |      |        |       |                       |         |        |        |
| <i>FAM101A</i>                 | 12  | 122456328 | 124801570 | 2345 | 40     | 1148  | 1.1*10 <sup>-21</sup> | Proxy   | No     | No     |
| <i>ZNF664</i>                  |     |           |           |      |        | 90    | 1.0*10 <sup>-10</sup> | Yes     | No     | No     |
| <i>FAM13A</i>                  | 4   | 89441199  | 90037050  | 596  | 4      | 1391  | 2.8*10 <sup>-16</sup> | Yes     | No     | No     |
| <i>EYA2</i>                    | 20  | 45522263  | 45818492  | 296  | 1      | 954   | 1.3*10 <sup>-15</sup> | Yes     | No     | Yes    |
| <i>DLEU1</i>                   | 13  | 50655307  | 51298372  | 643  | 1      | 1807  | 1.6*10 <sup>-15</sup> | Yes     | Yes    | Yes    |
| <i>GANAB</i>                   | 11  | 62062754  | 62522660  | 460  | 23     | 29    | 2.1*10 <sup>-12</sup> | Yes     | No     | No     |
| <b>WHI<sub>UKB</sub> men</b>   |     |           |           |      |        |       |                       |         |        |        |
| <i>DLEU1</i>                   | 13  | 50655307  | 51298372  | 643  | 1      | 1807  | 7.2*10 <sup>-13</sup> | Yes     | Yes    | Yes    |
| <i>MSRA</i>                    | 8   | 9910778   | 11874043  | 1963 | 22     | 1662  | 9.5*10 <sup>-13</sup> | Proxy   | Yes    | Yes    |
| <i>PINX1</i>                   |     |           |           |      |        | 457   | 7.7*10 <sup>-5</sup>  | Yes     | No     | No     |
| <i>ZMIZ1</i>                   | 10  | 80827792  | 81077276  | 249  | 1      | 817   | 2.7*10 <sup>-11</sup> | Yes     | Yes    | Yes    |
| <i>ERI1</i>                    | 8   | 8639864   | 9026646   | 387  | 4      | 501   | 3.5*10 <sup>-11</sup> | Novel   | No     | No     |
| <i>C6orf48</i>                 | 6   | 29908037  | 32732311  | 2824 | 69     | 27    | 3.7*10 <sup>-11</sup> | Proxy   | No     | No     |
| <i>EHMT2</i>                   |     |           |           |      |        | 62    | 2.3*10 <sup>-10</sup> | Yes     | No     | No     |
| <b>ABS<sub>UKB</sub> women</b> |     |           |           |      |        |       |                       |         |        |        |
| <i>FAM101A</i>                 | 12  | 122456328 | 124801570 | 2345 | 33     | 1148  | 1.6*10 <sup>-19</sup> | Proxy   | No     | No     |
| <i>DNAH10OS</i>                |     |           |           |      |        | 21    | 1.5*10 <sup>-11</sup> | Yes     | No     | No     |
| <i>COBLL1</i>                  | 2   | 165348322 | 165813035 | 465  | 3      | 619   | 1.1*10 <sup>-13</sup> | Yes     | No     | No     |
| <i>SSPN</i>                    | 12  | 26273924  | 26987131  | 713  | 2      | 622   | 4.3*10 <sup>-12</sup> | Yes     | Yes    | Yes    |
| <i>TRIB1</i>                   | 8   | 126102921 | 126451647 | 349  | 2      | 17    | 1.2*10 <sup>-11</sup> | Yes     | No     | Yes    |
| <i>HSPB2</i>                   | 11  | 111596632 | 112065528 | 469  | 15     | 10    | 1.6*10 <sup>-11</sup> | Proxy   | No     | No     |
| <i>PPP2R1B</i>                 |     |           |           |      |        | 40    | 1.3*10 <sup>-10</sup> | Yes     | No     | Yes    |
| <b>ABS<sub>UKB</sub> men</b>   |     |           |           |      |        |       |                       |         |        |        |
| <i>XKR6</i>                    | 8   | 9910778   | 11874043  | 1963 | 19     | 1144  | 5.9*10 <sup>-13</sup> | Novel   | No     | No     |
| <i>HOXC6</i>                   | 12  | 54377849  | 54450813  | 73   | 7      | 80    | 4.1*10 <sup>-11</sup> | Yes     | No     | No     |
| <i>ADAMTSL3</i>                | 15  | 84114980  | 84915120  | 800  | 3      | 1120  | 1.0*10 <sup>-10</sup> | Yes     | Yes    | No     |
| <i>ERI1</i>                    | 8   | 8639864   | 9026646   | 387  | 4      | 501   | 3.2*10 <sup>-8</sup>  | Novel   | No     | No     |
| <i>TBX15</i>                   | 1   | 119424669 | 119684294 | 260  | 2      | 310   | 6.0*10 <sup>-8</sup>  | Yes     | Yes    | No     |
| <b>H<sub>UKB</sub> women</b>   |     |           |           |      |        |       |                       |         |        |        |
| <i>EYA2</i>                    | 20  | 45522263  | 45818492  | 296  | 1      | 954   | 2.6*10 <sup>-17</sup> | Novel   | No     | Yes    |
| <i>SLC30A10</i>                | 1   | 219857769 | 220132989 | 275  | 1      | 1006  | 1.5*10 <sup>-15</sup> | Novel   | Yes    | No     |
| <i>SSPN</i>                    | 12  | 26271959  | 26987131  | 715  | 3      | 622   | 1.2*10 <sup>-13</sup> | Novel   | Yes    | Yes    |
| <i>ADAMTSL3</i>                | 15  | 83423114  | 84709594  | 1286 | 11     | 1120  | 1.9*10 <sup>-13</sup> | Yes     | Yes    | No     |
| <i>DLEU1</i>                   | 13  | 50655307  | 51298372  | 643  | 1      | 1807  | 2.6*10 <sup>-13</sup> | Yes     | Yes    | Yes    |
| <b>H<sub>UKB</sub> men</b>     |     |           |           |      |        |       |                       |         |        |        |
| <i>DLEU1</i>                   | 13  | 50655307  | 51298372  | 643  | 1      | 1807  | 1.2*10 <sup>-12</sup> | Yes     | Yes    | Yes    |
| <i>EYA2</i>                    | 20  | 45522263  | 45818492  | 296  | 1      | 954   | 1.6*10 <sup>-10</sup> | Novel   | No     | Yes    |
| <i>PEMT</i>                    | 17  | 17407877  | 18084116  | 676  | 5      | 243   | 5.9*10 <sup>-10</sup> | Novel   | Yes    | No     |
| <i>PLXND1</i>                  | 3   | 129273018 | 129613419 | 340  | 2      | 185   | 1.2*10 <sup>-8</sup>  | Yes     | Yes    | No     |
| <i>AKR1C2</i>                  | 10  | 4933796   | 5061223   | 127  | 2      | 190   | 2.5*10 <sup>-8</sup>  | Novel   | Yes    | No     |

Shown are the five highest-ranked lead genes per index and sex in ascending order of their p-value. Significant SNPs were identified with MAGMA v1.08 employed in FUMA v1.3.6a and those

within 250 kb of each other were consolidated in genomic risk regions, represented by a lead gene (lowest p-value).

**CHR** – chromosome; **Start BP** – starting position of the earliest gene included in the genomic risk region; **Stop BP** – stopping position of the latest gene included in the genomic risk region; **kb** – length in kb pairs of the genomic risk region; **nGenes** – number of genes included in the genomic risk region; **nSNPs** – number of single nucleotide polymorphisms included in the lead gene; **P<sub>adj</sub>** – gene-level association p-value from MAGMA, with Bonferroni correction for multiple comparisons of 19,088 genes; **Catalog** – match of any gene in the genomic risk region with a gene previously reported in association with the corresponding traditional body-shape index; **Height** – match of the gene with a gene previously reported in association with height; **Cancer** – match of the gene with a gene previously reported in association with cancer; **Yes** – previously reported lead gene (or previously reported gene, for match with cancer or height); **Proxy** – previously reported gene included in the genomic risk locus but not the lead gene (the grey rows show the previously reported gene with lowest p-value in the corresponding genomic risk region); **No** – not reported.

Significant genes were matched against genes reported in the NHGRI-EBI GWAS Catalog [ref. 11] (<https://www.ebi.ac.uk/gwas/home>, accessed on 07/04/2021) in association with the corresponding traditional body-shape index (with or without adjustment for body mass index) (column Catalog), i.e. the waist-to-hip ratio for WHI<sub>UKB</sub> (catalogue sets EFO\_0004343, EFO\_0007788, EFO\_0004302), waist circumference for ABSI<sub>UKB</sub> (EFO\_0004342, EFO\_0007789, EFO\_0004302), or hip circumference for HI<sub>UKB</sub> (EFO\_0005093, EFO\_0008039, EFO\_0004302), or in association with height (for column Height) (EFO\_0004339, EFO\_0004302) or cancer (for column Cancer) (EFO\_0000311).

**Supplementary Table S5 Pearson's partial correlation coefficients between anthropometric measures and indices**

|                        | WOMEN  |        |       |       |                        |       |                    |       |                       |      |                     |       |                       |       |                   |  |
|------------------------|--------|--------|-------|-------|------------------------|-------|--------------------|-------|-----------------------|------|---------------------|-------|-----------------------|-------|-------------------|--|
|                        | Height | Weight | BMI   | WHR   | WHR <sub>adj</sub> BMI | WHI   | WHI <sub>UKB</sub> | WC    | WC <sub>adj</sub> BMI | ABSI | ABSI <sub>UKB</sub> | HC    | HC <sub>adj</sub> BMI | HI    | HI <sub>UKB</sub> |  |
| MEN                    |        |        |       |       |                        |       |                    |       |                       |      |                     |       |                       |       |                   |  |
| Height                 |        | 0.30   | -0.13 | -0.07 | -0.01                  | 0.00  | 0.03               | 0.05  | 0.32                  | 0.05 | 0.04                | 0.15  | 0.51                  | -0.04 | 0.01              |  |
| Weight                 | 0.42   |        | 0.88  | 0.43  | 0.01                   | -0.06 | 0.01               | 0.85  | 0.14                  | 0.12 | 0.00                | 0.90  | 0.21                  | 0.01  | -0.01             |  |
| BMI                    | -0.07  | 0.91   |       | 0.48  | 0.02                   | -0.06 | 0.00               | 0.86  | 0.01                  | 0.11 | -0.01               | 0.87  | 0.00                  | 0.02  | -0.02             |  |
| WHR                    | -0.05  | 0.55   | 0.63  |       | 0.88                   | 0.84  | 0.87               | 0.81  | 0.55                  | 0.64 | 0.60                | 0.34  | -0.28                 | -0.51 | -0.34             |  |
| WHR <sub>adj</sub> BMI | -0.01  | 0.02   | 0.04  | 0.79  |                        | 0.99  | 1.00               | 0.36  | 0.70                  | 0.76 | 0.76                | -0.18 | -0.36                 | -0.42 | -0.43             |  |
| WHI                    | -0.02  | 0.10   | 0.12  | 0.84  | 0.99                   |       | 1.00               | 0.44  | 0.70                  | 0.77 | 0.77                | -0.11 | -0.35                 | -0.43 | -0.42             |  |
| WHI <sub>UKB</sub>     | 0.04   | 0.02   | 0.01  | 0.78  | 1.00                   | 0.99  |                    | 0.35  | 0.72                  | 0.77 | 0.78                | -0.18 | -0.32                 | -0.40 | -0.42             |  |
| WC                     | 0.15   | 0.86   | 0.87  | 0.76  | 0.40                   | 0.34  | 0.39               |       | 0.49                  | 0.57 | 0.46                | 0.81  | 0.12                  | 0.06  | 0.03              |  |
| WC <sub>adj</sub> BMI  | 0.42   | 0.21   | 0.01  | 0.71  | 0.80                   | 0.80  | 0.81               | 0.49  |                       | 0.95 | 0.95                | 0.12  | 0.22                  | 0.04  | 0.05              |  |
| ABSI                   | 0.08   | 0.10   | 0.07  | 0.79  | 0.84                   | 0.83  | 0.84               | 0.52  | 0.93                  |      | 0.99                | 0.15  | 0.09                  | 0.07  | 0.07              |  |
| ABSI <sub>UKB</sub>    | 0.05   | 0.02   | -0.01 | 0.74  | 0.84                   | 0.85  | 0.85               | 0.44  | 0.92                  | 1.00 |                     | 0.03  | 0.08                  | 0.07  | 0.07              |  |
| HC                     | 0.29   | 0.87   | 0.79  | 0.25  | -0.17                  | -0.24 | -0.18              | 0.82  | 0.26                  | 0.20 | 0.13                |       | 0.48                  | 0.42  | 0.40              |  |
| HC <sub>adj</sub> BMI  | 0.57   | 0.25   | -0.02 | -0.34 | -0.39                  | -0.39 | -0.37              | 0.19  | 0.41                  | 0.24 | 0.22                | 0.58  |                       | 0.83  | 0.85              |  |
| HI                     | -0.01  | -0.30  | -0.33 | -0.38 | -0.47                  | -0.46 | -0.46              | -0.19 | 0.18                  | 0.20 | 0.23                | 0.19  | 0.76                  |       | 1.00              |  |
| HI <sub>UKB</sub>      | 0.01   | -0.01  | -0.03 | -0.40 | -0.47                  | -0.46 | -0.46              | 0.09  | 0.21                  | 0.24 | 0.24                | 0.47  | 0.82                  | 0.95  |                   |  |

**Men** – bottom-left half of panel; **Women** – top-right half of panel; **ABSI** – a body shape index; **BMI** – body mass index; **HC** – hip circumference; **HI** – hip index; **WC** – waist circumference; **WHI** – waist-to-hip index; **WHR** – waist-to-hip ratio; ...<sub>adj</sub>**BMI** – ... adjusted for BMI;

**Note:** ABSI and HI were calculated using published regression coefficients [refs. 5, 6]; Indices marked with "...<sub>UKB</sub>" were calculated using regression coefficients derived from UK Biobank data; WHI was calculated rounding the regression coefficients obtained from UK Biobanks data to whole numbers and simple fractions with the formula:  $WHI = WHR * [Weight (kg) / Height^2 (cm)]^{-1/4}$ . All anthropometric measures correspond to the baseline visit. Pearson's partial correlation coefficients were derived with adjustment for age at the baseline visit.

**Supplementary Table S6 Regression coefficients of models used to calibrate allometric body-shape indices for UK Biobank participants**

|                                                                   | <b>Women</b> |                |         |                | <b>Men</b> |                |         |                |
|-------------------------------------------------------------------|--------------|----------------|---------|----------------|------------|----------------|---------|----------------|
|                                                                   | Estimate     | Standard Error | t-value | R <sup>2</sup> | Estimate   | Standard Error | t-value | R <sup>2</sup> |
| <b>Waist circumference (cm) [48-0.0] for ABSI<sub>UKB</sub>*</b>  |              |                |         |                |            |                |         |                |
| Intercept                                                         | -2.78104     | 0.00340        | -819    | 0.784          | -2.64309   | 0.00335        | -790    | 0.795          |
| Weight (kg)                                                       | 0.71354      | 0.00080        | 892     |                | 0.69306    | 0.00082        | 844     |                |
| Height (m)                                                        | -0.88703     | 0.00386        | -230    |                | -0.83902   | 0.00343        | -245    |                |
| <b>Hip circumference (cm) [49-0.0] for HI<sub>UKB</sub></b>       |              |                |         |                |            |                |         |                |
| Intercept                                                         | 4.39844      | 0.01111        | 396     | 0.836          | 3.83776    | 0.01117        | 343     | 0.759          |
| Weight (kg)                                                       | 0.49002      | 0.00047        | 1048    |                | 0.40345    | 0.00055        | 727     |                |
| Height (cm)                                                       | -0.36311     | 0.00226        | -161    |                | -0.19217   | 0.00232        | -83     |                |
| <b>Waist-to-hip ratio [48-0.0 / 49-0.0] for WHI<sub>UKB</sub></b> |              |                |         |                |            |                |         |                |
| Intercept                                                         | 1.51062      | 0.02123        | 71      | 0.229          | 1.98816    | 0.01749        | 114     | 0.377          |
| Weight (kg)                                                       | 0.22352      | 0.00089        | 250     |                | 0.28961    | 0.00087        | 334     |                |
| Height (cm)                                                       | -0.52393     | 0.00432        | -121    |                | -0.64685   | 0.00363        | -178    |                |

**ABSI** – a body shape index; **HI** – hip index; **WHI** – waist-to-hip index; **Weight** – at baseline; **Height** – at baseline; Measures were used in the units specified in brackets; **t-value** – Wald test statistics (+/-1.96 corresponds to significance level p=0.05); **R<sup>2</sup>** – proportion explained variability; \* – the values for ABSI were additionally multiplied by 1000, in order to obtain numbers in the magnitude of waist circumference; [...] – code corresponding to the UK Biobank variable(s) used to generate the index. Each of the log-transformed body-shape indices was regressed on log-transformed weight and log-transformed height.

**Supplementary Table S7 Genetic variant exclusions defining the genetic relationship matrix**

| CHR          | Loaded variants | WOMEN (n=219,872) |                  |               |                |                | MEN (n=186,825) |                  |               |                |                |
|--------------|-----------------|-------------------|------------------|---------------|----------------|----------------|-----------------|------------------|---------------|----------------|----------------|
|              |                 | GT rate           | Removed variants |               |                | Used variants  | GT rate         | Removed variants |               |                | Used variants  |
|              |                 |                   | --geno           | --hwe         | --maf          |                |                 | --geno           | --hwe         | --maf          |                |
| 1            | 63,487          | 0.9742            | 8,500            | 2,653         | 26,837         | 25,497         | 0.9737          | 8,494            | 2,464         | 26,957         | 25,572         |
| 2            | 61,966          | 0.9675            | 9,188            | 2,536         | 25,011         | 25,231         | 0.9672          | 91,68            | 2,327         | 25,131         | 25,340         |
| 3            | 52,300          | 0.9691            | 7,603            | 1,964         | 21,344         | 21,389         | 0.9687          | 7,580            | 1,804         | 21,440         | 21,476         |
| 4            | 47,443          | 0.9731            | 6,742            | 2,034         | 18,720         | 19,947         | 0.9728          | 6,709            | 1,858         | 18,847         | 20,029         |
| 5            | 46,314          | 0.9585            | 7,100            | 1,992         | 18,170         | 19,052         | 0.9584          | 7,085            | 1,815         | 18,302         | 19,112         |
| 6            | 53,695          | 0.9752            | 7,847            | 2,305         | 20,089         | 23,454         | 0.9745          | 7,826            | 2,142         | 20,173         | 23,554         |
| 7            | 42,722          | 0.9719            | 6,038            | 1,870         | 17,059         | 17,755         | 0.9716          | 6,048            | 1,732         | 17,137         | 17,805         |
| 8            | 38,591          | 0.9739            | 5,157            | 1,699         | 15,377         | 16,358         | 0.9737          | 5,144            | 1,556         | 15,495         | 16,396         |
| 9            | 34,310          | 0.9733            | 4,890            | 1,525         | 13,465         | 14,430         | 0.9728          | 4,890            | 1,384         | 13,544         | 14,492         |
| 10           | 38,308          | 0.9701            | 5,579            | 1,661         | 15,147         | 15,921         | 0.9697          | 5,559            | 1,546         | 15,208         | 15,995         |
| 11           | 40,824          | 0.9671            | 6,029            | 1,656         | 17,108         | 16,031         | 0.9667          | 6,027            | 1,508         | 17,189         | 16,100         |
| 12           | 37,302          | 0.9739            | 5,108            | 1,509         | 15,143         | 15,542         | 0.9735          | 5,100            | 1,364         | 15,231         | 15,607         |
| 13           | 26,806          | 0.9422            | 5,121            | 1,020         | 9,622          | 11,043         | 0.9421          | 5,118            | 947           | 9,652          | 11,089         |
| 14           | 25,509          | 0.9738            | 3,599            | 1,053         | 10,386         | 10,471         | 0.9734          | 3,595            | 961           | 10,438         | 10,515         |
| 15           | 24,467          | 0.9763            | 3,279            | 1,038         | 9,628          | 10,522         | 0.9758          | 3,283            | 972           | 9,649          | 10,563         |
| 16           | 28,960          | 0.9727            | 4,015            | 1,230         | 11,852         | 11,863         | 0.9722          | 4,021            | 1,128         | 11,893         | 11,918         |
| 17           | 28,835          | 0.9555            | 5,114            | 1,081         | 11,470         | 11,170         | 0.9548          | 5,113            | 1,004         | 11,513         | 11,205         |
| 18           | 21,962          | 0.9716            | 3,089            | 891           | 8,132          | 9,850          | 0.9713          | 3,083            | 815           | 8,189          | 9,875          |
| 19           | 26,186          | 0.9676            | 4,536            | 1,208         | 10,827         | 9,615          | 0.9666          | 4,528            | 1,111         | 10,896         | 9,651          |
| 20           | 19,959          | 0.9709            | 2,545            | 791           | 7,906          | 8,717          | 0.9707          | 2,549            | 711           | 7,954          | 8,745          |
| 21           | 11,342          | 0.9750            | 1,579            | 494           | 4,218          | 5,051          | 0.9745          | 1,578            | 454           | 4,239          | 5,071          |
| 22           | 12,968          | 0.9730            | 1,666            | 621           | 4,932          | 5,749          | 0.9727          | 1,663            | 558           | 4,960          | 5,787          |
| <b>Total</b> | <b>784,256</b>  |                   | <b>114,324</b>   | <b>32,831</b> | <b>312,443</b> | <b>324,658</b> |                 | <b>114,161</b>   | <b>30,161</b> | <b>314,037</b> | <b>325,897</b> |

CHR – chromosome; GT rate – genotyping rate; --geno – genotype missingness <0.015; --maf – minor allele frequency MAF>5%; --hwe – Hardy-Weinberg exact test  $p>1*10^{-6}$ .



**Supplementary Table S8 Bayesian mixed-model analysis BOLT-LMM quality control**

| <b>WOMEN</b>                                                                                                   | <b>WHI<sub>UKB</sub></b> | <b>WHR<sub>adj</sub>BMI</b> | <b>ABSI<sub>UKB</sub></b> | <b>WC<sub>adj</sub>BMI</b> | <b>HI<sub>UKB</sub></b> | <b>HC<sub>adj</sub>BMI</b> |
|----------------------------------------------------------------------------------------------------------------|--------------------------|-----------------------------|---------------------------|----------------------------|-------------------------|----------------------------|
| <b>Heritability</b>                                                                                            |                          |                             |                           |                            |                         |                            |
| Estimated (pseudo-)heritability: $h^2_g$                                                                       | 0.258                    | 0.253                       | 0.211                     | 0.244                      | 0.178                   | 0.273                      |
| Approximate standard error: 316/N                                                                              | 0.001                    | 0.001                       | 0.001                     | 0.001                      | 0.001                   | 0.001                      |
| <b>Variance parameters</b>                                                                                     |                          |                             |                           |                            |                         |                            |
| $\sigma^2_K$                                                                                                   | 0.251                    | 0.245                       | 0.203                     | 0.238                      | 0.177                   | 0.267                      |
| logDelta                                                                                                       | 1.057                    | 1.083                       | 1.316                     | 1.132                      | 1.532                   | 0.980                      |
| f                                                                                                              | $4.6 \times 10^{-5}$     | $5.5 \times 10^{-5}$        | $-2.0 \times 10^{-4}$     | $6.3 \times 10^{-5}$       | $-6.1 \times 10^{-5}$   | $1.7 \times 10^{-3}$       |
| <b>Mixed model associations statistics</b> (inflation of LINREG chisq stats estimated using MLMe as reference) |                          |                             |                           |                            |                         |                            |
| SNPs after outlier window removal <sup>a</sup>                                                                 | 319,769                  | 319,769                     | 321,169                   | 321,114                    | 321,788                 | 321,016                    |
| Intercept of LD Score regression (ref stats)                                                                   | 1.230 (0.025)            | 1.225 (0.025)               | 1.183 (0.020)             | 1.213 (0.022)              | 1.156 (0.017)           | 1.202 (0.021)              |
| Estimated attenuation                                                                                          | 0.233 (0.050)            | 0.229 (0.053)               | 0.215 (0.055)             | 0.236 (0.029)              | 0.267 (0.029)           | 0.175 (0.027)              |
| Intercept of LD Score regression (cur stats)                                                                   | 1.235 (0.024)            | 1.239 (0.024)               | 1.198 (0.021)             | 1.265 (0.022)              | 1.276 (0.016)           | 1.533 (0.024)              |
| Calibration factor (ref/cur) (inf model) <sup>b</sup>                                                          | 0.996 (0.003)            | 0.989 (0.003)               | 0.987 (0.002)             | 0.959 (0.003)              | 0.906 (0.003)           | 0.784 (0.006)              |
| Linear regression intercept inflation <sup>c</sup>                                                             | 1.0041                   | 1.0113                      | 1.0130                    | 1.0425                     | 1.1040                  | 1.2757                     |
| Proportion variance explained (inf model) <sup>b</sup>                                                         | 0.092                    | 0.089                       | 0.068                     | 0.088                      | 0.048                   | 0.108                      |
| <b>Calibration stats: mean and lambdaGC</b> (over SNPs used in GRM)                                            |                          |                             |                           |                            |                         |                            |
| Mean linear regression <sup>c</sup> (324,658 good SNPs)                                                        | 2.028                    | 2.034                       | 1.876                     | 1.969                      | 1.735                   | 2.502                      |
| $\lambda_{GC}$ linear regression model <sup>c</sup>                                                            | 1.515                    | 1.521                       | 1.467                     | 1.559                      | 1.516                   | 2.004                      |
| Mean BOLT-LMM infinitesimal model <sup>b</sup> (324,658 good SNPs)                                             | 2.102                    | 2.095                       | 1.899                     | 1.952                      | 1.621                   | 2.219                      |
| $\lambda_{GC}$ BOLT-LMM infinitesimal model <sup>b</sup>                                                       | 1.522                    | 1.512                       | 1.468                     | 1.519                      | 1.374                   | 1.596                      |
| <b>MEN</b>                                                                                                     |                          |                             |                           |                            |                         |                            |
| <b>Heritability</b>                                                                                            |                          |                             |                           |                            |                         |                            |
| Estimated (pseudo-)heritability: $h^2_g$                                                                       | 0.170                    | 0.162                       | 0.149                     | 0.225                      | 0.145                   | 0.276                      |
| Approximate standard error: 316/N                                                                              | 0.002                    | 0.002                       | 0.002                     | 0.002                      | 0.002                   | 0.002                      |
| <b>Variance parameters</b>                                                                                     |                          |                             |                           |                            |                         |                            |
| $\sigma^2_K$                                                                                                   | 0.162                    | 0.155                       | 0.138                     | 0.217                      | 0.144                   | 0.271                      |
| logDelta                                                                                                       | 1.587                    | 1.640                       | 1.745                     | 1.234                      | 1.771                   | 0.962                      |
| f                                                                                                              | $-4.8 \times 10^{-5}$    | $1.7 \times 10^{-3}$        | $2.4 \times 10^{-4}$      | $9.3 \times 10^{-5}$       | $7.7 \times 10^{-4}$    | $1.4 \times 10^{-3}$       |

Continues on next page

| MEN                                                                                                            | WHI <sub>UKB</sub> | WHR <sub>adj</sub> BMI | ABSI <sub>UKB</sub> | WC <sub>adj</sub> BMI | HI <sub>UKB</sub> | HC <sub>adj</sub> BMI |
|----------------------------------------------------------------------------------------------------------------|--------------------|------------------------|---------------------|-----------------------|-------------------|-----------------------|
| <b>Mixed model associations statistics</b> (inflation of LINREG chisq stats estimated using MLMe as reference) |                    |                        |                     |                       |                   |                       |
| SNPs after outlier window removal <sup>a</sup>                                                                 | 323,858            | 323,858                | 323,858             | 323,858               | 323,858           | 323,123               |
| Intercept of LD Score regression (ref stats)                                                                   | 1.104 (0.016)      | 1.099 (0.015)          | 1.106 (0.014)       | 1.151 (0.021)         | 1.117 (0.013)     | 1.168 (0.022)         |
| Estimated attenuation                                                                                          | 0.154 (0.049)      | 0.147 (0.053)          | 0.204 (0.046)       | 0.203 (0.036)         | 0.279 (0.033)     | 0.163 (0.043)         |
| Intercept of LD Score regression (cur stats)                                                                   | 1.108 (0.015)      | 1.101 (0.015)          | 1.171 (0.013)       | 1.323 (0.021)         | 1.189 (0.015)     | 1.410 (0.025)         |
| Calibration factor (ref/cur) (inf model) <sup>b</sup>                                                          | 0.996 (0.002)      | 0.998 (0.002)          | 0.945 (0.003)       | 0.871 (0.004)         | 0.939 (0.003)     | 0.829 (0.007)         |
| Linear regression <sup>c</sup> intercept inflation                                                             | 1.00363            | 1.00187                | 1.05871             | 1.14861               | 1.06515           | 1.20666               |
| Proportion variance explained (inf model) <sup>b</sup>                                                         | 0.042              | 0.039                  | 0.035               | 0.070                 | 0.031             | 0.104                 |
| <b>Calibration stats: mean and lambdaGC</b> (over SNPs used in GRM)                                            |                    |                        |                     |                       |                   |                       |
| Mean linear regression <sup>c</sup> (325,897 good SNPs)                                                        | 1.668              | 1.663                  | 1.600               | 1.923                 | 1.487             | 2.275                 |
| $\lambda_{GC}$ linear regression model <sup>c</sup>                                                            | 1.383              | 1.373                  | 1.420               | 1.651                 | 1.387             | 1.841                 |
| Mean BOLT-LMM infinitesimal model <sup>b</sup> (325,897 good SNPs)                                             | 1.679              | 1.675                  | 1.520               | 1.749                 | 1.420             | 2.081                 |
| $\lambda_{GC}$ BOLT-LMM infinitesimal model <sup>b</sup>                                                       | 1.390              | 1.380                  | 1.344               | 1.448                 | 1.312             | 1.551                 |

**ABSI<sub>UKB</sub>** – a body shape index calibrated for UK Biobank participants, i.e. calculated using allometric regression coefficients derived from UK Biobank data; **HC<sub>adj</sub>BMI** – hip circumference adjusted for body mass index (BMI); **HI<sub>UKB</sub>** – hip index calibrated for UK Biobank participants; **WC<sub>adj</sub>BMI** – waist circumference adjusted for BMI; **WHI<sub>UKB</sub>** – waist-to-hip index calibrated for UK Biobank participants; **WHR<sub>adj</sub>BMI** – waist-to-hip ratio adjusted for BMI;  $\lambda_{GC}$  – genomic inflation factor based on the coresets of variants used in the genetic relationship matrix (GRM); <sup>a</sup> – variants (single nucleotide polymorphisms, SNPs) passing filters before outlier removal (322,638 out of 324,658 for women, 323,858 out of 325,897 for men); masking windows around outlier SNPs (chisq > 219.9 for women, chisq > 186.8 for men); <sup>b</sup> – BOLT-LMM using a Gaussian SNP effect prior, equivalent to the standard “infinitesimal” mixed model; <sup>c</sup> – linear regression using 20 principal component covariates.

**Supplementary Table S9 Candidate SNPs identified with FUMA**

(separate file *TABS9\_snps.zip* for file *TABS9\_snps.csv*)

Independent significant single nucleotide polymorphisms (SNPs) were variants with genome wide significance ( $p \leq 5 \times 10^{-8}$ ) and in approximate linkage equilibrium with each other ( $r^2 < 0.6$  within 1 Mb distance). Candidate SNPs were variants with nominal significance  $p \leq 0.05$ , within 1 Mb distance and in linkage disequilibrium at  $r^2 \geq 0.6$  with an independent significant SNP (based on FUMA v1.3.6a output per sex and index). Note that for all annotations gene symbol Mar-01 should be MARCH1.

**Index: ABSIUKB** – a body shape index calibrated for UK Biobank participants, i.e. calculated using allometric regression coefficients derived from UK Biobank data; **HC** – hip circumference adjusted for body mass index (BMI); **HIUKB** – hip index calibrated for UK Biobank participants; **WC** – waist circumference adjusted for BMI; **WHI** – waist-to-hip index calibrated for UK Biobank participants; **WHR** – waist-to-hip ratio adjusted for BMI;

**uniqID** – unique identifier generated by FUMA with chromosome, position, and alleles in alphabetical order;

**rsID** – user generated unique identifier provided as input for FUMA, comprising chromosome, position, minor allele, major allele;

**chr** – chromosome number;

**pos** – position on the chromosome;

**non\_effect\_allele** – the major allele;

**effect\_allele** – the minor allele, with frequency  $< 0.5$  determined in the dataset (note that for variants with frequency close to 0.5 the minor allele may differ between men and women);

**MAF** – minor allele frequency;

**INFO** – imputation quality score ( $\text{INFO} > 0.9$  for all candidate SNPs);

**gwasP** – p-value from BOLT-LMM infinitesimal model for the corresponding body-shape index;

**beta / se** – regression coefficient and standard error from BOLT-LMM infinitesimal model for the corresponding body-shape index;

**r<sup>2</sup>** – the maximum  $r^2$  of the SNP with one of the independent significant SNP;

**IndSigSNP** – rsID of the independent significant SNP corresponding to the maximum  $r^2$ ;

**GenomicLocus** – number of the corresponding genomic risk locus (further details in Supplementary Table S9);

**nearestGene** – nearest gene annotated with ANNOVAR implemented in FUMA;

- dist** – distance to the nearest gene from FUMA (SNPs located in the gene body or 1kb up- or down-stream of TSS or TES have 0);
- func** – functional consequence of the SNP on the gene obtained from ANNOVAR;
- exonic\_func** – functional consequence of an exonic SNP on the gene obtained from ANNOVAR;
- CADD** – Combined Annotation Dependent Depletion (deleteriousness) score, computed based on 63 annotations;
- RDB** – RegulomeDB categorical score (from 1a to 7, with 1a being the highest score, indicating that the SNP has the most biological evidence to be regulatory element);
- minChrState** – The minimum 15-core chromatin state across 127 tissue/cell type;
- commonChrState** – the most common 15-core chromatin state across 127 tissue/cell types;
- posMapFilt** – whether the SNP was used for positional mapping or not. 1 is used, otherwise 0.
- SNP** – rs identifier (when unavailable, replaced with ID generated from Variance Effect Predictor (VEP) v.90);
- gcSNP** – rs identifier as for SNP, but when unavailable replaced with chromosome:position (used for matching with NHGRI-EBI GWAS Catalog);
- NEAREST\_GENES** – nearest gene(s) annotated with VEP;
- NEAREST\_DIST** – distance to nearest gene from VEP;
- Damaging** – damaging variant according to VEP;
- CONSEQUENCES** – biological consequences according to VEP.
- Catalog** – match with SNPs reported in the NHGRI-EBI GWAS Catalog (<https://www.ebi.ac.uk/gwas/home>, accessed on 07/04/2021) in association with the corresponding traditional body-shape index (with or without adjustment for body mass index, BMI), i.e. the waist-to-hip ratio for WHIUKB and WHR (catalogue sets EFO\_0004343, EFO\_0007788, EFO\_0004302), waist circumference for ABSIUKB and WC (EFO\_0004342, EFO\_0007789, EFO\_0004302), or hip circumference for HIUKB and HC (EFO\_0005093, EFO\_0008039, EFO\_0004302) (1 – Yes, 0 – No);
- WHR** – match with SNPs reported in association with WHR or WHR<sub>adj</sub>BMI (1/0);
- WC** – match with SNPs reported for WC or WC<sub>adj</sub>BMI (1/0);
- HC** – match with SNPs reported for HC or HC<sub>adj</sub>BMI (1/0);
- Height** – match with SNPs reported for height (EFO\_0004339, EFO\_0004302) (1 – Yes, 0 – No);
- Cancer** – match with SNPs reported for cancer (EFO\_0000331) (1 – Yes, 0 – No);
- SexDiff** – p-value for sex difference of effect size  $p_{\text{sex}} < 5 \times 10^{-6}$ ;
- IndexDiff** – p-value for difference of effect size between the corresponding allometric and traditional index  $p_{\text{difference}} < 5 \times 10^{-6}$ .

**Supplementary Table S10 Results from FUMA and MAGMA**

(separate file *TABS10\_FUMA\_MAGMA.xlsx*)

**IndSigSNPs** – independent significant single nucleotide polymorphisms (SNPs) with genome wide significance ( $p \leq 5 \times 10^{-8}$ ) and in approximate linkage equilibrium with each other ( $r^2 < 0.6$  within 1 Mb distance) (based on FUMA v.1.3.6a output per sex and index).

**Index: ABSIUKB** – a body shape index calibrated for UK Biobank participants, i.e. calculated using allometric regression coefficients derived from UK Biobank data; **HC** – hip circumference adjusted for body mass index (BMI); **HIUKB** – hip index calibrated for UK Biobank participants; **WC** – waist circumference adjusted for BMI; **WHI** – waist-to-hip index calibrated for UK Biobank participants; **WHR** – waist-to-hip ratio adjusted for BMI;

**No** – number of the independent significant SNP per index (ordered by chromosome and position);

**GenomicLocus** – number of genomic risk locus to which the SNP was allocated (details for genomic loci are shown in tab GenomicRiskLoci);

**uniqID** – unique identifier generated by FUMA with chromosome, position, and alleles in alphabetical order;

**rsID** – user generated unique identifier provided as input for FUMA, comprising chromosome, position, minor allele, major allele;

**chr** – chromosome number;

**pos** – position on the chromosome;

**p** – p-value from BOLT-LMM infinitesimal model for the corresponding body-shape index;

**nSNPs** – number of candidate SNPs clumped with the independent significant SNP (with nominal significance  $p \leq 0.05$ , within 1 Mb distance and in linkage disequilibrium at  $r^2 \geq 0.6$ );

**SNP** – rs identifier (when unavailable, replaced with ID generated from Variance Effect Predictor (VEP) v.90);

**gcSNP** – rs identifier as for SNP, but when unavailable replaced with chromosome:position (used for matching with NHGRI-EBI GWAS Catalog);

**nearestGene** – nearest gene annotated with ANNOVAR implemented in FUMA;

**dist** – distance to the nearest gene from FUMA;

**NEAREST\_GENES** – nearest gene(s) annotated with VEP;

**NEAREST\_DIST** – distance to nearest gene from VEP;

**Catalog** – match of any candidate SNP in the LD block (clump) of the independent significant SNP (i.e. in high linkage equilibrium,  $r^2 \geq 0.6$ ) with SNPs reported in the NHGRI-EBI GWAS Catalog (<https://www.ebi.ac.uk/gwas/home>, accessed on 07/04/2021) in association with the corresponding traditional body-shape index (with or without adjustment for body mass index, BMI), i.e. the waist-to-hip ratio for WHIUKB and WHR (catalogue sets EFO\_0004343, EFO\_0007788, EFO\_0004302), waist circumference for ABSIUKB and WC (EFO\_0004342, EFO\_0007789, EFO\_0004302), or hip circumference for HIUKB and HC (EFO\_0005093, EFO\_0008039, EFO\_0004302) (1 – Yes, 0 – No);

**CatalogDir** – match with SNPs reported for the corresponding traditional body-shape index (2 – direct match of the independent significant SNP, 1 – match of a candidate SNP in the clump, 0 – no match for any candidate SNP in the clump);

**WHR** – match of any candidate SNP in the clump with SNPs reported in association with WHR or  $WHR_{adj}BMI$  (1/0);

**WC** – match for any candidate SNP in the clump with SNPs reported for WC or  $WC_{adj}BMI$  (1/0);

**HC** – match for any candidate SNP in the clump with SNPs reported for HC or  $HC_{adj}BMI$  (1/0);

**Height** – match for any candidate SNP in the clump with SNPs reported for height (EFO\_0004339, EFO\_0004302) (1 – Yes, 0 – No);

**HeightDir** – match with SNPs reported for height (2 – direct match of the independent significant SNP, 1 – match of a candidate SNP in the clump, 0 – no match for any candidate SNP in the clump);

**Cancer** – match for any candidate SNP in the clump with SNPs reported for cancer (EFO\_0000311) (1 – Yes, 0 – No);

**CancerDir** – match with SNPs reported for cancer (2 – direct match of the independent significant SNP, 1 – match of a candidate SNP in the clump, 0 – no match for any candidate SNP in the clump);

**SexDiff** – p-value for sex difference of effect size for the independent significant SNP  $p_{sex} < 5 \cdot 10^{-6}$  (1 – Yes, 0 – No);

**IndexDiff** – p-value for difference of effect size between the corresponding allometric and traditional index for the independent significant SNP  $p_{difference} < 5 \cdot 10^{-6}$  (1/0);

**SexDiff\_P** – p-value for sex difference of effect size for the independent significant SNP;

**IndexDiff\_P** – p-value for difference of effect size between the corresponding allometric and traditional index for the independent significant SNP;

**ABSIHIDiff\_P** – p-value for difference of effect size between  $ABSI_{UKB}$  and  $HI_{UKB}$  for the independent significant SNP.

**leadSNPs** – independent significant SNPs within 1 Mb distance of each other and with  $r^2 \geq 0.1$  were further clumped and were represented by a lead SNP (the one with the lowest p-value) (based on FUMA output per sex and index). Column headings as per IndSigSNPs tab, with information corresponding to the lead SNP, except the following:

**nIndSigSNPs** – number of independent significant SNPs in the clump;

**IndSigSNPs** – rsID of the independent significant SNPs in the clump, separated with (,);

**Catalog** – match with SNPs reported in association with the corresponding traditional body-shape index for any candidate SNP in the clump;

**CatalogDir** – match with SNPs reported for the corresponding traditional body-shape index (2 – direct match of the lead SNP, 1 – match of a candidate SNP in the clump, 0 – no match);

**Height** – marked as 1 if any candidate SNP in the LD block of the lead SNP (i.e. in high linkage equilibrium,  $r^2 \geq 0.6$ ) has been reported in association with height;

**HeightDir** – match with SNPs reported for height (2 – direct match of the lead SNP, 1 – match of any candidate SNP in the LD block of the lead SNP, 0 – no match for any candidate SNP in the LD block of the lead SNP);

**Cancer** – marked as 1 if any candidate SNP in the LD block of the lead SNP has been reported in association with cancer;

**CancerDir** – match with SNPs reported for cancer (2 – direct match of the lead SNP, 1 – match of any candidate SNP in the LD block of the lead SNP, 0 – no match for any candidate SNP in the LD block of the lead SNP).

**GenomicRiskLoci** – lead SNPs within 250 kb distance of each other were further clumped into non-overlapping independent significant genetic risk loci, represented by a locus lead SNP (the one with the lowest p-value) (based on FUMA output per sex and index). Column headings as per IndSigSNPs and leadSNPs tabs, with information corresponding to the locus lead SNP, except the following:

**start** – position of the earliest candidate SNP in the locus;

**end** – position of the earliest candidate SNP in the locus;

**nLeadSNPs** – number of lead SNPs in the clump;

**LeadSNPs** – rsID of the lead SNPs in the clump, separated with semi-colon (;);

**Catalog** – match with SNPs reported in the NHGRI-EBI GWAS Catalog in association with the corresponding traditional body-shape index for any candidate SNP in the locus clump;

**CatalogDir** – match with SNPs reported for the corresponding traditional body-shape index (2 – direct match of the locus lead SNP, 1 – match of a candidate SNP in the locus clump, 0 – no match);

**Height** – marked as 1 if any candidate SNP in the LD block of the locus lead SNP (i.e. in high linkage equilibrium,  $r^2 \geq 0.6$ ) has been reported in association with height;

**HeightDir** – match with SNPs reported for height (2 – direct match of the locus lead SNP, 1 – match of any candidate SNP in the LD block of the locus lead SNP, 0 – no match for any candidate SNP in the LD block of the locus lead SNP);

**Cancer** – marked as 1 if any candidate SNP in the LD block of the locus lead SNP has been reported in association with cancer;

**CancerDir** – match with SNPs reported for cancer (2 – direct match of the locus lead SNP, 1 – match of any candidate SNP in the LD block of the locus lead SNP, 0 – no match for any candidate SNP in the LD block of the locus lead SNP).

**magma.genes** – all genes used in MAGMA v.1.08 implemented in FUMA v1.3.6a. Significance for the corresponding body-shape index and sex is determined by  $p_{adj} < 0.05$ , after Bonferroni correction for 19,088 genes of the corresponding unadjusted p-value (P\_INDEX\_Sex). The output is based on MAGMA, which uses the complete distribution of variants with high imputation quality INFO > 0.9 and minor allele frequency MAF > 0.01.

**N** – gene number (1 to 19,088);

**GENE** – Ensembl v92 identification number;

**CHR** – chromosome number;

**START/STOP** – annotation boundaries of the gene, including a 1 kb window at each end;

**NSPS** – number of SNPs annotated to the gene found in the data;

**NPARAM** – number of parameters used in the model by MAGMA;

**SYMBOL** – Ensembl gene symbol;

**ZSTAT** – the Z-value for the gene, calculated by MAGMA based on its (permutation) p-value, used as the measure of gene association in the gene-level analyses;

**P** – the unadjusted p-value calculated by MAGMA for the gene, based on a SNP-wide mean model using user supplied p-values (for all SNPs annotated to the gene), obtained from BOLT-LMM infinitesimal models for the corresponding body-shape index (note that Bonferroni correction for 19,088 genes has to be applied to calculate the adjusted p-value ( $p_{adj}$ ), which determines significance at a nominal level  $p < 0.05$ );

**Annotation of ZSTAT and P** – column headings are annotated with index and sex as follows:

**ABSIUKB** – a body shape index calibrated for UK Biobank participants, i.e. calculated using



allometric regression coefficients derived from UK Biobank data; **HC** – hip circumference adjusted for body mass index (BMI); **HIUKB** – hip index calibrated for UK Biobank participants; **WC** – waist circumference adjusted for BMI; **WHI** – waist-to-hip index calibrated for UK Biobank participants; **WHR** – waist-to-hip ratio adjusted for BMI; **0** – in women; **1** – in men;

**WHR** – match with gene symbols for variants reported in the NHGRI-EBI GWAS Catalog in association with WHR or  $WHR_{adjBMI}$  (1 – Yes, 0 – No);

**WC** – match with gene symbols for variants reported in association with WC or  $WC_{adjBMI}$  (1/0);

**HC** – match with gene symbols for variants reported in association with HC or  $HC_{adjBMI}$  (1/0);

**Fat** – match with gene symbols for variants reported in association with body composition, fat distribution and visceral fat: catalogue sets EFO\_0004341, EFO\_0004765, EFO\_0004767, EFO\_0005106, EFO\_0004302 (1/0);

**BMI** – match with gene symbols for variants reported in association with BMI, weight, subcutaneous adipose tissue and body fat: catalogue sets EFO\_0004338, EFO\_0004340, EFO\_0004764, EFO\_0004766, EFO\_0005409, EFO\_0007800, EFO\_0004302 (1/0);

**Height** – match with gene symbols for variants reported in association with height: catalogue sets EFO\_0004339 and EFO\_0004302 (1/0);

**Cancer** – match with gene symbols for variants reported in association with cancer: catalogue set EFO\_0000331 (1/0).

**magma.regions** – significant genes identified in MAGMA for the corresponding body-shape index with gene boundaries within 250 kb of each other were clumped in genomic risk regions represented by a lead gene with the lowest p-value. This output includes all significant genes per body-shape index and sex, with columns corresponding to the magma.genes tab, except for:

**MEDIAN** – median between the annotation boundaries of the significant gene (START/STOP);

**REGION** – region number;

**START\_MIN** – annotation boundary START of the gene with the earliest position in the region;

**STOP\_MAX** – annotation boundary STOP of the gene with the latest position in the region;

**P\_MIN** – p-value of the lead gene in the region;

**REG\_GENE** – Ensembl identification number of the lead gene for the region;

**REG\_SYMBOL** – symbol of the lead gene in the region;

**REG\_MEDIAN** – median between the annotation boundaries of the region (START\_MIN to STOP\_MAX);

**REG\_COUNT** – number of significant genes clumped in the region;

**REG\_CATALOG** – match with gene symbols for variants reported in the NHGRI-EBI GWAS

Catalog in association with the corresponding traditional body-shape index for any significant gene included in the region (1 – Yes, 0 – No);

**REG\_CATALOG\_DIR** – match with genes reported for the corresponding traditional body-shape index (2 – direct match of the lead gene, 1 – match of any significant gene included in the region, 0 – no match).

**REG\_HEIGHT\_DIR** – match with genes reported for height (1 – direct match of the lead gene, 0 – no match or match only of a clumped significant gene, not the lead gene).

**REG\_CANCER\_DIR** – match with genes reported for cancer (1 – direct match of the lead gene, 0 – no match or match only of a clumped significant gene, not the lead gene).

Columns Sex, Index, CHR, REGION, START\_MIN, STOP\_MAX, P\_MIN and all columns marked with REG can be compacted to unique values for the regions per index and sex.

**magma.gsa** – MAGMA gene-set analysis output (includes all gene sets). Significance for the corresponding body-shape index and sex is determined by  $p_{adj} < 0.05$ , after Bonferroni correction for 15,485 gene sets of the corresponding unadjusted p-value (P\_INDEX\_Sex).

**FULL\_NAME** – name of the gene set in four categories: curated gene sets (including the name of the public database, e.g. KEGG, Biocarta, Reactome etc.) and the three gene ontology categories: biological pathway (GO-BP), cellular component (GO-CC) and molecular function (GO-MF);

**NGENES** – the number of genes in the data included in the set;

**BETA** – the regression coefficient for the gene-set calculated with MAGMA;

**BETA\_STD** – the semi-standardized regression coefficient, corresponding to the predicted change in Z-value given a change of one standard deviation in the predictor gene set (i.e. BETA divided by the variable's standard deviation), calculated by MAGMA;

**SE** – the standard error of the regression coefficient;

**P** – the unadjusted p-value calculated by MAGMA for the gene set, based on competitive gene-set analysis (note that Bonferroni correction for 15,485 gene sets has to be applied to calculate the adjusted p-value ( $p_{adj}$ ), which determines significance at a nominal level  $p < 0.05$ ).

**Annotation of BETA, BETA\_STD, SE and P** – column headings are annotated with index and sex as in **magma.genes** tab;

**magma.eqtl** – MAGMA output for associations with expression Quantitative Trait Loci (eQTL) from the Genotype-Tissue Expression (GTEx) v8.0 database (includes all examined individual tissues). Significance for the corresponding body-shape index and sex is determined by  $p_{adj} < 0.05$ , after Bonferroni correction for 54 tissues of the corresponding unadjusted p-value (P\_INDEX\_Sex). A total of 17,299 genes were used in the analysis for each tissue.

**FULL\_NAME** – name of the individual tissue;

**NGENES** – the number of genes in the data included in the set;

**BETA** – the regression coefficient for the tissue calculated with MAGMA;

**BETA\_STD** – the semi-standardized regression coefficient;

**SE** – the standard error of the regression coefficient;

**P** – the unadjusted p-value calculated by MAGMA for the tissue, based on competitive gene property analysis (note that Bonferroni correction for 54 tissues has to be applied to calculate the adjusted p-value ( $p_{adj}$ ), which determines significance at a nominal level  $p < 0.05$ ).

**Annotation of BETA, BETA\_STD, SE and P** – column headings are annotated with index and sex as in **magma.genes** tab;

**anthropometry traits** – rules for assignment of specific anthropometric category for traits included in the general catalogue set EFO\_0004302 anthropometric measurements.

**N** – number of the reported trait;

**Trait.s** – name of the reported trait in the NHGRI-EBI GWAS Catalog;

**Freq** – frequency of the reported trait in catalog set EFO\_0004302;

**ReSet** – name of the assigned individual anthropometric category defined in the study.

**efo traits** – details of the NHGRI-EBI GWAS Catalog sets used for matching in the study (<https://www.ebi.ac.uk/gwas/home>, accessed on 07/04/2021).

**EFO** – catalogue set number;

**Trait** – anthropometric trait defined in the study;

**Name** – name of the set in the NHGRI-EBI GWAS Catalog;

**Assoc** – number of variants included in the catalogue set;

**Studies** – number of studies included in the catalogue set;

**Set** – anthropometric category used for matching: 1 – waist-to-hip ratio; 2 – waist circumference; 3 – hip circumference; 4 – (Fat) body composition, fat distribution and visceral adipose tissue; 5 – BMI, weight, body fat, subcutaneous adipose tissue; 6 – height; 7 – the general anthropometric measurements catalogue set, which was distributed between the other anthropometric categories).

Note that for all annotations gene symbol Mar-01 should be MARCH1.

**Supplementary Table S11 GWAS Summary statistics for all candidate SNPs**

(separate file *TABS11\_gwas.bolt.snps.zip*, including file *TABS11a\_gwas.bolt.snps.f.csv* for women and file *TABS11b\_gwas.bolt.snps.m.csv* for men)

Independent significant single nucleotide polymorphisms (SNPs) identified with FUMA v.1.3.6a were variants with genome wide significance ( $p \leq 5 \times 10^{-8}$ ) and in approximate linkage equilibrium with each other ( $r^2 < 0.6$  within 1 Mb distance). Candidate SNPs were variants with nominal significance  $p \leq 0.05$ , within 1 Mb distance and in linkage disequilibrium at  $r^2 \geq 0.6$  with an independent significant SNP. The output in these files is based on BOLT-LMM infinitesimal models. Note that for all annotations, gene symbol Mar-01 should be MARCH1.

**rsID** – identity number constructed from Chromosome, Position (base pairs), A1 allele and A2 allele;

**SNP** – single nucleotide polymorphism (rs number or when missing chromosome, position and alleles provided by Variant Effect Predictor (VEP), v90);

**CHR** – chromosome number;

**BP** – position on chromosome (base pairs);

**A1** – minor allele (allele frequency determined in the dataset  $< 0.5$ , note that for alleles with frequency near 0.5 the minor allele may differ between men and women);

**A2** – major allele;

**MAF** – frequency of A1 allele in the examined population;

**INFO** – imputation quality factor (INFO  $> 0.9$  for all SNPs used in FUMA);

**BETA** – regression coefficient (corresponding to A1 allele) from BOLT-LMM infinitesimal model;  
**SE** – standard error from BOLT-LMM infinitesimal model;

**CHISQ\_BOLT\_LMM\_INF** –  $\chi^2$  statistics from BOLT-LMM infinitesimal model;

**P\_BOLT\_LMM\_INF** – p-value from BOLT-LMM infinitesimal model;

**Annotation of BETA, SE, CHISQ and P: ABSIUKB** – a body shape index calibrated for UK Biobank participants, i.e. calculated using allometric regression coefficients derived from UK Biobank data; **HC** – hip circumference adjusted for body mass index (BMI); **HIUKB** – hip index calibrated for UK Biobank participants; **WC** – waist circumference adjusted for BMI; **WHIUKB** – waist-to-hip index calibrated for UK Biobank participants; **WHR** – waist-to-hip ratio adjusted for BMI.

**Damaging / CONSEQUENCES** – provided by VEP;

**NEAREST\_DIST** – smallest distance in BP to the nearest gene;

**NEAREST\_GENES** – location with the nearest protein-coding transcription start site within a window of 200 kb from the position of the examined variant (if more than one location satisfied this requirement, these were separated with a coma).
